# Supplementary material for: Comparative Transcriptome Analysis and Expression of Genes Associated with Polysaccharide Biosynthesis in Dendrobium officinale Diploid and Tetraploid Plants
Source: MDPI journal article supplement (doi:10.3390/agronomy14010069), 2023-12-27
Supplement: s1 [file s1]

Archive with 4 entries (4 files):
- Transcriptom tetraploid D.officinale_Supp Table S2_Polyshaccharide, manose.xlsx
- Transcriptome tetraploid D.officinale_Supp Figure S2.pdf
- Transcriptome tetraploid D.officinale_Supp Figures S1, S3 and S4.pdf
- Transcriptome tetraploid D.officinale_Supp Tables S1 and S3.pdf
