# Supplementary material for: Comparative Transcriptome Analysis and Expression of Genes Associated with Polysaccharide Biosynthesis in Dendrobium officinale Diploid and Tetraploid Plants
Source: MDPI journal article supplement (doi:10.3390/agronomy14010069), 2023-12-27
Supplement: s1 [file s1 › Transcriptom tetraploid D.officinale_Supp Table S2_Polyshaccharide, manose.xlsx]

## Sheet: Polysaccharides-GTs
gene_id	sample_readcount(AP)	sample_readcount(BP)	sample_readcount(AD)	sample_readcount(BD)	sample_fpkm(AP)	sample_fpkm(BP)	sample_fpkm(AD)	sample_fpkm(BD)	Gene Length	KO ID	KO Name	KO Description	Http Link
Glucosyltransferase
Cluster-29035.173112	0	2.25	2.11	0	0	0.68	0.57	0	409	K03850	ALG10	alpha-1,2-glucosyltransferase	http://www.genome.jp/dbget-bin/www_bget?ko:K03850
Cluster-29035.173110	9.49	0	0	2.02	1	0	0	0.19	700	K03850	ALG10	alpha-1,2-glucosyltransferase	http://www.genome.jp/dbget-bin/www_bget?ko:K03850
Cluster-29035.173111	121.89	313.4	210.75	291.4	3.51	8.86	5.53	7.43	1899	K03850	ALG10	alpha-1,2-glucosyltransferase	http://www.genome.jp/dbget-bin/www_bget?ko:K03850
Cluster-29035.173114	173.62	3.35	80.14	10.58	5	0.09	2.11	0.27	1897	K03850	ALG10	alpha-1,2-glucosyltransferase	http://www.genome.jp/dbget-bin/www_bget?ko:K03850
Cluster-29035.75460	31.04	3.03	11.76	13.59	1.65	0.16	0.57	0.64	1145	K03849	ALG8	alpha-1,3-glucosyltransferase	http://www.genome.jp/dbget-bin/www_bget?ko:K03849
Cluster-29035.181633	0	67.52	36.43	48.75	0	2.73	1.37	1.77	1405	K03849	ALG8	alpha-1,3-glucosyltransferase	http://www.genome.jp/dbget-bin/www_bget?ko:K03849
Cluster-29035.156807	42.64	66.63	58.94	77.53	1.83	2.81	2.3	2.94	1358	K03849	ALG8	alpha-1,3-glucosyltransferase	http://www.genome.jp/dbget-bin/www_bget?ko:K03849
Cluster-29035.75461	12.83	0	0	0	0.38	0	0	0	1855	K03849	ALG8	alpha-1,3-glucosyltransferase	http://www.genome.jp/dbget-bin/www_bget?ko:K03849
Cluster-29035.57211	0	0	0	0	0	0	0	0	1760	K03849	ALG8	alpha-1,3-glucosyltransferase	http://www.genome.jp/dbget-bin/www_bget?ko:K03849
Cluster-29035.75462	86.45	236.07	142.75	211.56	2.79	7.47	4.2	6.04	1723	K03849	ALG8	alpha-1,3-glucosyltransferase	http://www.genome.jp/dbget-bin/www_bget?ko:K03849
Cluster-29035.75459	140.38	49.74	90.99	15.58	4.84	1.68	2.86	0.48	1628	K03849	ALG8	alpha-1,3-glucosyltransferase	http://www.genome.jp/dbget-bin/www_bget?ko:K03849
Cluster-29035.58788	13.65	0	15.13	0	1.52	0	1.54	0	675	K03849	ALG8	alpha-1,3-glucosyltransferase	http://www.genome.jp/dbget-bin/www_bget?ko:K03849
Cluster-29035.38344	0	0	0	0	0	0	0	0	1566	K03849	ALG8	alpha-1,3-glucosyltransferase	http://www.genome.jp/dbget-bin/www_bget?ko:K03849
Cluster-29035.61885	38.01	50.06	0	36.11	0.72	0.93	0	0.61	2749	K03848	ALG6	alpha-1,3-glucosyltransferase	http://www.genome.jp/dbget-bin/www_bget?ko:K03848
Cluster-29035.61883	0	0	71.53	0	0	0	1.24	0	2749	K03848	ALG6	alpha-1,3-glucosyltransferase	http://www.genome.jp/dbget-bin/www_bget?ko:K03848
Cluster-29035.160017	96.49	51.27	67.23	107.77	2.71	1.41	1.72	2.68	1942	K03848	ALG6	alpha-1,3-glucosyltransferase	http://www.genome.jp/dbget-bin/www_bget?ko:K03848
Cluster-29035.184719	0	109.56	89.28	139.77	0	3.14	2.38	3.61	1876	K03848	ALG6	alpha-1,3-glucosyltransferase	http://www.genome.jp/dbget-bin/www_bget?ko:K03848
Cluster-29035.61879	5.52	1.75	0	1.32	1.62	0.52	0	0.35	411	K03848	ALG6	alpha-1,3-glucosyltransferase	http://www.genome.jp/dbget-bin/www_bget?ko:K03848
Cluster-29035.160018	38.2	11.45	47.31	35.89	0.86	0.25	0.97	0.71	2367	K03848	ALG6	alpha-1,3-glucosyltransferase	http://www.genome.jp/dbget-bin/www_bget?ko:K03848
Cluster-29035.61884	35.72	11.66	36.93	0	0.65	0.21	0.61	0	2867	K03848	ALG6	alpha-1,3-glucosyltransferase	http://www.genome.jp/dbget-bin/www_bget?ko:K03848
Cluster-29035.112505	77.05	53.25	79.72	46.14	3.79	2.58	3.57	2.01	1215	K03848	ALG6	alpha-1,3-glucosyltransferase	http://www.genome.jp/dbget-bin/www_bget?ko:K03848
Cluster-29035.35605	0	3.06	0	5.11	0	11.81	0	15.07	237	K13495	CISZOG	cis-zeatin O-glucosyltransferase	http://www.genome.jp/dbget-bin/www_bget?ko:K13495
Cluster-29035.115456	7	12	2	2	5.06	9.13	1.3	1.29	311	K13495	CISZOG	cis-zeatin O-glucosyltransferase	http://www.genome.jp/dbget-bin/www_bget?ko:K13495
Cluster-29035.192052	0	4	2	9	0	0.96	0.43	1.91	448	K13495	CISZOG	cis-zeatin O-glucosyltransferase	http://www.genome.jp/dbget-bin/www_bget?ko:K13495
Cluster-29035.142353	1.47	0	3	0	0.56	0	1.03	0	374	K13495	CISZOG	cis-zeatin O-glucosyltransferase	http://www.genome.jp/dbget-bin/www_bget?ko:K13495
Cluster-29035.104859	5	1	7	2	34.09	8.81	43.02	12.74	215	K13495	CISZOG	cis-zeatin O-glucosyltransferase	http://www.genome.jp/dbget-bin/www_bget?ko:K13495
Cluster-29035.196784	2	0	2	8	0.17	0	0.16	0.61	804	K13495	CISZOG	cis-zeatin O-glucosyltransferase	http://www.genome.jp/dbget-bin/www_bget?ko:K13495
Cluster-29035.225488	1	0	0	4	0.12	0	0	0.42	652	K13495	CISZOG	cis-zeatin O-glucosyltransferase	http://www.genome.jp/dbget-bin/www_bget?ko:K13495
Cluster-29035.115802	227.94	161.52	151.59	118.31	65.44	46.74	39.33	30.17	415	K13495	CISZOG	cis-zeatin O-glucosyltransferase	http://www.genome.jp/dbget-bin/www_bget?ko:K13495
Cluster-29035.214861	1.23	107.05	21.06	72.53	0.35	30.98	5.46	18.5	415	K13495	CISZOG	cis-zeatin O-glucosyltransferase	http://www.genome.jp/dbget-bin/www_bget?ko:K13495
Cluster-29035.116100	23.19	62.36	35.41	13.4	7.67	20.88	10.57	3.94	393	K13495	CISZOG	cis-zeatin O-glucosyltransferase	http://www.genome.jp/dbget-bin/www_bget?ko:K13495
Cluster-29035.64380	17.96	0	48.47	35.96	0.59	0	1.45	1.05	1696	K13495	CISZOG	cis-zeatin O-glucosyltransferase	http://www.genome.jp/dbget-bin/www_bget?ko:K13495
Cluster-29035.64379	32.04	97	102.53	310.04	1.07	3.19	3.13	9.19	1668	K13495	CISZOG	cis-zeatin O-glucosyltransferase	http://www.genome.jp/dbget-bin/www_bget?ko:K13495
Cluster-29035.148377	8.35	3	8.13	5.62	0.48	0.17	0.42	0.29	1078	K13495	CISZOG	cis-zeatin O-glucosyltransferase	http://www.genome.jp/dbget-bin/www_bget?ko:K13495
Cluster-29035.173710	0	0	1.31	0	0	0	0.06	0	1244	K13495	CISZOG	cis-zeatin O-glucosyltransferase	http://www.genome.jp/dbget-bin/www_bget?ko:K13495
Cluster-29035.108520	0	0	11.99	0.78	0	0	29.86	1.98	242	K13495	CISZOG	cis-zeatin O-glucosyltransferase	http://www.genome.jp/dbget-bin/www_bget?ko:K13495
Cluster-29035.122697	105.58	4	105.15	32.38	4.13	0.15	3.75	1.12	1463	K13495	CISZOG	cis-zeatin O-glucosyltransferase	http://www.genome.jp/dbget-bin/www_bget?ko:K13495
Cluster-29035.122698	129.07	0	47.42	0	4.95	0	1.66	0	1488	K13495	CISZOG	cis-zeatin O-glucosyltransferase	http://www.genome.jp/dbget-bin/www_bget?ko:K13495
Cluster-29035.106349	86.05	51.63	76.93	73.89	17.98	10.79	14.57	13.7	477	K13495	CISZOG	cis-zeatin O-glucosyltransferase	http://www.genome.jp/dbget-bin/www_bget?ko:K13495
Cluster-29035.93981	23.2	0	5.37	0	14.77	0	3.07	0	321	K13495	CISZOG	cis-zeatin O-glucosyltransferase	http://www.genome.jp/dbget-bin/www_bget?ko:K13495
Cluster-29035.164426	12.32	1.01	10.35	4.05	2.09	0.17	1.59	0.61	530	K13495	CISZOG	cis-zeatin O-glucosyltransferase	http://www.genome.jp/dbget-bin/www_bget?ko:K13495
Cluster-29035.108517	79.47	79.29	64.69	70.47	10.84	10.74	8.02	8.52	598	K13495	CISZOG	cis-zeatin O-glucosyltransferase	http://www.genome.jp/dbget-bin/www_bget?ko:K13495
Cluster-29035.108521	329.88	50.8	125.9	33.35	44.99	6.88	15.6	4.03	598	K13495	CISZOG	cis-zeatin O-glucosyltransferase	http://www.genome.jp/dbget-bin/www_bget?ko:K13495
Cluster-29035.111237	12.81	5.91	6	5	64.91	37.56	27.29	23.46	223	K13495	CISZOG	cis-zeatin O-glucosyltransferase	http://www.genome.jp/dbget-bin/www_bget?ko:K13495
Cluster-29035.85090	6	17	17.18	32.77	1.61	4.58	4.16	7.79	427	K13493	UGT76C1_2	cytokinin-N-glucosyltransferase	http://www.genome.jp/dbget-bin/www_bget?ko:K13493
Cluster-29035.127345	77	12	35	9.97	15.48	2.41	6.38	1.78	486	K13493	UGT76C1_2	cytokinin-N-glucosyltransferase	http://www.genome.jp/dbget-bin/www_bget?ko:K13493
Cluster-29035.154197	101.11	88.67	87.53	100.27	3.28	2.83	2.59	2.88	1713	K00729	ALG5	dolichyl-phosphate beta-glucosyltransferase	http://www.genome.jp/dbget-bin/www_bget?ko:K00729
Cluster-29035.129883	830.18	433.33	627.33	445.2	26.72	13.7	18.41	12.69	1725	K00729	ALG5	dolichyl-phosphate beta-glucosyltransferase	http://www.genome.jp/dbget-bin/www_bget?ko:K00729
Cluster-29035.154196	10.62	6.9	22.73	14.26	0.47	0.3	0.92	0.56	1317	K00729	ALG5	dolichyl-phosphate beta-glucosyltransferase	http://www.genome.jp/dbget-bin/www_bget?ko:K00729
Cluster-29035.215133	0	11.29	13.6	4.55	0	0.45	0.5	0.16	1426	K00729	ALG5	dolichyl-phosphate beta-glucosyltransferase	http://www.genome.jp/dbget-bin/www_bget?ko:K00729
Cluster-29035.173372	12.63	9.05	7.4	3.75	0.39	0.28	0.21	0.1	1772	K00729	ALG5	dolichyl-phosphate beta-glucosyltransferase	http://www.genome.jp/dbget-bin/www_bget?ko:K00729
Cluster-29035.216909	0	66.69	21.42	71.94	0	5.59	1.66	5.41	809	K00729	ALG5	dolichyl-phosphate beta-glucosyltransferase	http://www.genome.jp/dbget-bin/www_bget?ko:K00729
Cluster-29035.3862	0	1	3.99	22.07	0	0.07	0.25	1.34	945	K08237	E2.4.1.218	hydroquinone glucosyltransferase	http://www.genome.jp/dbget-bin/www_bget?ko:K08237
Cluster-29035.62279	8.89	0	7.72	0	0.48	0	0.38	0	1122	K08237	E2.4.1.218	hydroquinone glucosyltransferase	http://www.genome.jp/dbget-bin/www_bget?ko:K08237
Cluster-29035.24136	10.9	10.14	7.51	2.12	0.6	0.55	0.38	0.1	1114	K08237	E2.4.1.218	hydroquinone glucosyltransferase	http://www.genome.jp/dbget-bin/www_bget?ko:K08237
Cluster-29035.221589	1.12	2.41	6.15	0	0.07	0.14	0.34	0	1028	K08237	E2.4.1.218	hydroquinone glucosyltransferase	http://www.genome.jp/dbget-bin/www_bget?ko:K08237
Cluster-29035.137163	4	0	3	0	0.33	0	0.23	0	826	K08237	E2.4.1.218	hydroquinone glucosyltransferase	http://www.genome.jp/dbget-bin/www_bget?ko:K08237
Cluster-29035.127060	16.13	0	12.68	0	0.52	0	0.37	0	1718	K08237	E2.4.1.218	hydroquinone glucosyltransferase	http://www.genome.jp/dbget-bin/www_bget?ko:K08237
Cluster-29035.88392	51.26	0	11.23	0	1.92	0	0.38	0	1519	K08237	E2.4.1.218	hydroquinone glucosyltransferase	http://www.genome.jp/dbget-bin/www_bget?ko:K08237
Cluster-29035.41789	23.83	70.45	44.4	48.88	0.92	2.66	1.55	1.66	1486	K08237	E2.4.1.218	hydroquinone glucosyltransferase	http://www.genome.jp/dbget-bin/www_bget?ko:K08237
Cluster-29035.111050	138	203.58	0	611.96	3.99	5.78	0	15.68	1891	K08237	E2.4.1.218	hydroquinone glucosyltransferase	http://www.genome.jp/dbget-bin/www_bget?ko:K08237
Cluster-29035.99838	0	100.42	505	110.04	0	2.87	13.39	2.83	1883	K08237	E2.4.1.218	hydroquinone glucosyltransferase	http://www.genome.jp/dbget-bin/www_bget?ko:K08237
Cluster-29035.26710	7.26	9.71	48.64	95.03	0.6	0.79	3.67	6.98	823	K08237	E2.4.1.218	hydroquinone glucosyltransferase	http://www.genome.jp/dbget-bin/www_bget?ko:K08237
Cluster-29035.62251	14.11	2.26	14.61	49.23	0.87	0.14	0.82	2.68	1021	K08237	E2.4.1.218	hydroquinone glucosyltransferase	http://www.genome.jp/dbget-bin/www_bget?ko:K08237
Cluster-29035.3861	0	1	16.12	41.92	0	0.05	0.75	1.88	1186	K08237	E2.4.1.218	hydroquinone glucosyltransferase	http://www.genome.jp/dbget-bin/www_bget?ko:K08237
Cluster-29035.159393	115.87	0	129.21	23.01	3.97	0	4.04	0.7	1636	K08237	E2.4.1.218	hydroquinone glucosyltransferase	http://www.genome.jp/dbget-bin/www_bget?ko:K08237
Cluster-29035.92660	767	1576	1292	1093	24.67	49.8	37.9	31.13	1726	K08237	E2.4.1.218	hydroquinone glucosyltransferase	http://www.genome.jp/dbget-bin/www_bget?ko:K08237
Cluster-29035.78553	10	22	29	54	0.38	0.83	1.02	1.84	1486	K08237	E2.4.1.218	hydroquinone glucosyltransferase	http://www.genome.jp/dbget-bin/www_bget?ko:K08237
Cluster-29035.142354	3.71	13.09	7.98	10.62	0.37	1.29	0.72	0.94	727	K08237	E2.4.1.218	hydroquinone glucosyltransferase	http://www.genome.jp/dbget-bin/www_bget?ko:K08237
Cluster-29035.149147	3.44	0	0	0	0.31	0	0	0	771	K08237	E2.4.1.218	hydroquinone glucosyltransferase	http://www.genome.jp/dbget-bin/www_bget?ko:K08237
Cluster-29035.100460	282.23	0	201.19	2.77	9.52	0	6.19	0.08	1657	K08237	E2.4.1.218	hydroquinone glucosyltransferase	http://www.genome.jp/dbget-bin/www_bget?ko:K08237
Cluster-29035.127900	7.97	47.03	45.56	163.97	0.27	1.55	1.39	4.86	1668	K08237	E2.4.1.218	hydroquinone glucosyltransferase	http://www.genome.jp/dbget-bin/www_bget?ko:K08237
Cluster-29035.191945	8	15.64	141.12	249.49	2.09	4.12	33.43	58.02	431	K13691	SGT1	pathogen-inducible salicylic acid glucosyltransferase	http://www.genome.jp/dbget-bin/www_bget?ko:K13691
Cluster-29035.30147	3.57	0.04	0.53	6.28	0.1	0	0.01	0.15	1991	K13691	SGT1	pathogen-inducible salicylic acid glucosyltransferase	http://www.genome.jp/dbget-bin/www_bget?ko:K13691
Cluster-29035.196361	1.39	0	0.03	0	0.04	0	0	0	1959	K13691	SGT1	pathogen-inducible salicylic acid glucosyltransferase	http://www.genome.jp/dbget-bin/www_bget?ko:K13691
Cluster-29035.30145	0	21.21	45.61	49.23	0	0.62	1.23	1.29	1856	K13691	SGT1	pathogen-inducible salicylic acid glucosyltransferase	http://www.genome.jp/dbget-bin/www_bget?ko:K13691
Cluster-29035.22186	0	6.09	50.15	91.82	0	0.31	2.36	4.2	1170	K13691	SGT1	pathogen-inducible salicylic acid glucosyltransferase	http://www.genome.jp/dbget-bin/www_bget?ko:K13691
Cluster-29035.210078	0	0	10.58	21.01	0	0	1.63	3.17	529	K13691	SGT1	pathogen-inducible salicylic acid glucosyltransferase	http://www.genome.jp/dbget-bin/www_bget?ko:K13691
Cluster-29035.169526	5	7	147.1	253.81	0.93	1.29	24.73	41.74	506	K13691	SGT1	pathogen-inducible salicylic acid glucosyltransferase	http://www.genome.jp/dbget-bin/www_bget?ko:K13691
Cluster-29035.30146	31.81	46.01	624.49	1183.14	0.94	1.33	16.8	30.91	1859	K13691	SGT1	pathogen-inducible salicylic acid glucosyltransferase	http://www.genome.jp/dbget-bin/www_bget?ko:K13691
Cluster-29035.191944	18.3	0	53.18	0	0.55	0	1.46	0	1827	K13691	SGT1	pathogen-inducible salicylic acid glucosyltransferase	http://www.genome.jp/dbget-bin/www_bget?ko:K13691
Cluster-29035.25385	0	18	51.28	60.74	0	0.57	1.51	1.73	1724	K13691	SGT1	pathogen-inducible salicylic acid glucosyltransferase	http://www.genome.jp/dbget-bin/www_bget?ko:K13691
Cluster-29035.32132	15.93	0	85.36	152.63	0.68	0	3.34	5.8	1357	K13691	SGT1	pathogen-inducible salicylic acid glucosyltransferase	http://www.genome.jp/dbget-bin/www_bget?ko:K13691
Cluster-29035.25113	0	7	41.2	44.33	0	0.64	3.48	3.65	761	K13691	SGT1	pathogen-inducible salicylic acid glucosyltransferase	http://www.genome.jp/dbget-bin/www_bget?ko:K13691
Cluster-29035.26516	0	0	0	0	0	0	0	0	741	K13691	SGT1	pathogen-inducible salicylic acid glucosyltransferase	http://www.genome.jp/dbget-bin/www_bget?ko:K13691
Cluster-12256.0	4	0	0	0	0.58	0	0	0	576	K13667	RUMI, KTELC1	protein glucosyltransferase	http://www.genome.jp/dbget-bin/www_bget?ko:K13667
Cluster-29035.141136	4.29	0	1.05	1	0.58	0	0.13	0.12	598	K05841	E2.4.1.173	sterol 3beta-glucosyltransferase	http://www.genome.jp/dbget-bin/www_bget?ko:K05841
Cluster-29035.134708	3.92	3.05	8.78	0	0.23	0.17	0.46	0	1075	K05841	E2.4.1.173	sterol 3beta-glucosyltransferase	http://www.genome.jp/dbget-bin/www_bget?ko:K05841
Cluster-29035.163125	92.61	64.37	35.74	52.37	5.35	3.67	1.88	2.68	1071	K05841	E2.4.1.173	sterol 3beta-glucosyltransferase	http://www.genome.jp/dbget-bin/www_bget?ko:K05841
Cluster-29035.47258	10.35	67.99	0	22.27	0.6	3.91	0	1.15	1063	K05841	E2.4.1.173	sterol 3beta-glucosyltransferase	http://www.genome.jp/dbget-bin/www_bget?ko:K05841
Cluster-29035.47259	0	32.66	0	38.4	0	1.96	0	2.07	1031	K05841	E2.4.1.173	sterol 3beta-glucosyltransferase	http://www.genome.jp/dbget-bin/www_bget?ko:K05841
Cluster-29035.163123	0	85.99	28.92	47.71	0	1.84	0.58	0.92	2422	K05841	E2.4.1.173	sterol 3beta-glucosyltransferase	http://www.genome.jp/dbget-bin/www_bget?ko:K05841
Cluster-29035.141135	218.24	0	134.38	0	4.83	0	2.71	0	2396	K05841	E2.4.1.173	sterol 3beta-glucosyltransferase	http://www.genome.jp/dbget-bin/www_bget?ko:K05841
Cluster-29035.163124	0	183.9	157.44	274.93	0	4.01	3.19	5.41	2386	K05841	E2.4.1.173	sterol 3beta-glucosyltransferase	http://www.genome.jp/dbget-bin/www_bget?ko:K05841
Cluster-29035.47260	7.03	0	44.34	0	0.16	0	0.94	0	2299	K05841	E2.4.1.173	sterol 3beta-glucosyltransferase	http://www.genome.jp/dbget-bin/www_bget?ko:K05841
Cluster-29035.112712	0	11.02	30.87	75.59	0	0.23	0.59	1.41	2511	K05841	E2.4.1.173	sterol 3beta-glucosyltransferase	http://www.genome.jp/dbget-bin/www_bget?ko:K05841
Cluster-29035.149992	151	77.66	42.23	48.92	3.11	1.57	0.79	0.89	2558	K05841	E2.4.1.173	sterol 3beta-glucosyltransferase	http://www.genome.jp/dbget-bin/www_bget?ko:K05841
Cluster-29035.149993	11.65	0.02	7.79	14.51	0.2	0	0.12	0.22	2986	K05841	E2.4.1.173	sterol 3beta-glucosyltransferase	http://www.genome.jp/dbget-bin/www_bget?ko:K05841
Cluster-29035.185894	0	2.26	0	0	0	0.08	0	0	1628	K05841	E2.4.1.173	sterol 3beta-glucosyltransferase	http://www.genome.jp/dbget-bin/www_bget?ko:K05841
Cluster-34427.0	0	8.04	1.11	6.13	0	1.15	0.14	0.78	581	K05841	E2.4.1.173	sterol 3beta-glucosyltransferase	http://www.genome.jp/dbget-bin/www_bget?ko:K05841
Cluster-29035.161029	17.79	0	37.88	68.61	0.39	0	0.75	1.32	2435	K05841	E2.4.1.173	sterol 3beta-glucosyltransferase	http://www.genome.jp/dbget-bin/www_bget?ko:K05841
Cluster-29035.142199	0	0	0	0	0	0	0	0	1505	K05841	E2.4.1.173	sterol 3beta-glucosyltransferase	http://www.genome.jp/dbget-bin/www_bget?ko:K05841
Cluster-29035.7366	1	2	0	3	0.36	0.73	0	0.95	382	K05841	E2.4.1.173	sterol 3beta-glucosyltransferase	http://www.genome.jp/dbget-bin/www_bget?ko:K05841
Cluster-29035.72938	0	0	0	0	0	0	0	0	1539	K05841	E2.4.1.173	sterol 3beta-glucosyltransferase	http://www.genome.jp/dbget-bin/www_bget?ko:K05841
Cluster-29035.140229	98.69	64.07	150.61	145.99	6.36	4.07	8.84	8.33	987	K05841	E2.4.1.173	sterol 3beta-glucosyltransferase	http://www.genome.jp/dbget-bin/www_bget?ko:K05841
Cluster-29035.90670	486.27	622.6	538.66	737.48	9.99	12.56	10.1	13.42	2560	K05841	E2.4.1.173	sterol 3beta-glucosyltransferase	http://www.genome.jp/dbget-bin/www_bget?ko:K05841
Cluster-29035.96050	473.79	659.37	176.08	510.71	13.17	18	4.46	12.57	1958	K05841	E2.4.1.173	sterol 3beta-glucosyltransferase	http://www.genome.jp/dbget-bin/www_bget?ko:K05841
Cluster-29035.96053	368.2	143.64	183.69	106.32	7.57	2.9	3.45	1.94	2558	K05841	E2.4.1.173	sterol 3beta-glucosyltransferase	http://www.genome.jp/dbget-bin/www_bget?ko:K05841
Cluster-29035.96051	243.75	83	540.75	475.5	6.77	2.26	13.7	11.7	1959	K05841	E2.4.1.173	sterol 3beta-glucosyltransferase	http://www.genome.jp/dbget-bin/www_bget?ko:K05841
Cluster-29035.96052	141.3	183.33	217.22	0	3.92	5	5.5	0	1961	K05841	E2.4.1.173	sterol 3beta-glucosyltransferase	http://www.genome.jp/dbget-bin/www_bget?ko:K05841
Cluster-29035.195309	3.27	130.73	33.82	22.19	0.07	2.71	0.65	0.42	2494	K05841	E2.4.1.173	sterol 3beta-glucosyltransferase	http://www.genome.jp/dbget-bin/www_bget?ko:K05841
Cluster-29035.59954	0	4.5	1.99	3.05	0	0.08	0.03	0.05	2922	K05841	E2.4.1.173	sterol 3beta-glucosyltransferase	http://www.genome.jp/dbget-bin/www_bget?ko:K05841
Cluster-29035.36362	7.36	0	5.52	0	0.26	0	0.18	0	1592	K05841	E2.4.1.173	sterol 3beta-glucosyltransferase	http://www.genome.jp/dbget-bin/www_bget?ko:K05841
Cluster-29035.185895	0	1.72	0	0	0	0.06	0	0	1564	K05841	E2.4.1.173	sterol 3beta-glucosyltransferase	http://www.genome.jp/dbget-bin/www_bget?ko:K05841
Cluster-29035.72936	389.2	181.08	110.13	106.31	9.09	4.15	2.35	2.2	2282	K05841	E2.4.1.173	sterol 3beta-glucosyltransferase	http://www.genome.jp/dbget-bin/www_bget?ko:K05841
Cluster-29035.61259	1	1	1	8	0.07	0.07	0.06	0.48	945	K05841	E2.4.1.173	sterol 3beta-glucosyltransferase	http://www.genome.jp/dbget-bin/www_bget?ko:K05841
Cluster-29035.104593	123	194	49	47	87.79	145.52	31.32	29.97	312	K13692	IAGLU	UDP-glucose:(indol-3-yl)acetate beta-D-glucosyltransferase	http://www.genome.jp/dbget-bin/www_bget?ko:K13692
Cluster-29035.110988	110.43	58.94	65.42	31	43.34	23.57	23.13	10.82	370	K13692	IAGLU	UDP-glucose:(indol-3-yl)acetate beta-D-glucosyltransferase	http://www.genome.jp/dbget-bin/www_bget?ko:K13692
Cluster-29035.107848	373.82	161.23	105.37	40.09	192.64	85.71	48.78	18.41	340	K13692	IAGLU	UDP-glucose:(indol-3-yl)acetate beta-D-glucosyltransferase	http://www.genome.jp/dbget-bin/www_bget?ko:K13692
Cluster-29035.110989	124.15	37.05	42.33	32	72.83	22.58	22.28	16.74	328	K13692	IAGLU	UDP-glucose:(indol-3-yl)acetate beta-D-glucosyltransferase	http://www.genome.jp/dbget-bin/www_bget?ko:K13692
Cluster-29035.78244	104.47	57.3	90.55	74.55	12.98	7.06	10.23	8.21	632	K11718	HUGT	UDP-glucose:glycoprotein glucosyltransferase	http://www.genome.jp/dbget-bin/www_bget?ko:K11718
Cluster-29035.135258	56	41.96	72	74.88	2.12	1.56	2.49	2.51	1503	K11718	HUGT	UDP-glucose:glycoprotein glucosyltransferase	http://www.genome.jp/dbget-bin/www_bget?ko:K11718
Cluster-29035.61244	5.57	2	0	1	0.83	0.29	0	0.13	570	K11718	HUGT	UDP-glucose:glycoprotein glucosyltransferase	http://www.genome.jp/dbget-bin/www_bget?ko:K11718
Cluster-30646.0	11.43	0	6	0	2.14	0	1.02	0	504	K11718	HUGT	UDP-glucose:glycoprotein glucosyltransferase	http://www.genome.jp/dbget-bin/www_bget?ko:K11718
Cluster-29035.102634	3436.82	1604.9	2649.32	1620.66	28.85	13.21	20.3	12.04	5905	K11718	HUGT	UDP-glucose:glycoprotein glucosyltransferase	http://www.genome.jp/dbget-bin/www_bget?ko:K11718
Cluster-29035.134943	0	43.08	6.12	24.68	0	0.66	0.09	0.34	3305	K11718	HUGT	UDP-glucose:glycoprotein glucosyltransferase	http://www.genome.jp/dbget-bin/www_bget?ko:K11718
Cluster-33035.0	0	1.04	0	3.12	0	0.06	0	0.17	1042	K11718	HUGT	UDP-glucose:glycoprotein glucosyltransferase	http://www.genome.jp/dbget-bin/www_bget?ko:K11718
Cluster-29035.163841	0	0	0	1.17	0	0	0	0.22	475	K11718	HUGT	UDP-glucose:glycoprotein glucosyltransferase	http://www.genome.jp/dbget-bin/www_bget?ko:K11718
Cluster-29035.199051	17	0	11	0	0.53	0	0.31	0	1779	K11718	HUGT	UDP-glucose:glycoprotein glucosyltransferase	http://www.genome.jp/dbget-bin/www_bget?ko:K11718
Cluster-29035.134942	28.18	3.02	20.56	12.5	15.98	1.78	10.46	6.32	331	K11718	HUGT	UDP-glucose:glycoprotein glucosyltransferase	http://www.genome.jp/dbget-bin/www_bget?ko:K11718
Mannosyltransferase
Cluster-29035.110869	104.37	118.2	127.41	113.63	17.08	19.26	18.92	16.49	540	K03844	ALG11	alpha-1,2-mannosyltransferase	http://www.genome.jp/dbget-bin/www_bget?ko:K03844
Cluster-29035.58953	13.43	0	9.29	0	0.84	0	0.53	0	1013	K03844	ALG11	alpha-1,2-mannosyltransferase	http://www.genome.jp/dbget-bin/www_bget?ko:K03844
Cluster-29035.205249	0	12	0	5	0	1.83	0	0.68	560	K03844	ALG11	alpha-1,2-mannosyltransferase	http://www.genome.jp/dbget-bin/www_bget?ko:K03844
Cluster-29035.86007	0	7.55	1.66	2.06	0	0.42	0.09	0.1	1095	K03844	ALG11	alpha-1,2-mannosyltransferase	http://www.genome.jp/dbget-bin/www_bget?ko:K03844
Cluster-29035.699	0	0	1	0	0	0	0.16	0	514	K03844	ALG11	alpha-1,2-mannosyltransferase	http://www.genome.jp/dbget-bin/www_bget?ko:K03844
Cluster-29035.117039	42.34	0	19.75	0	2.65	0	1.13	0	1007	K03844	ALG11	alpha-1,2-mannosyltransferase	http://www.genome.jp/dbget-bin/www_bget?ko:K03844
Cluster-29035.157758	17.03	0	15.55	0	0.67	0	0.56	0	1452	K03844	ALG11	alpha-1,2-mannosyltransferase	http://www.genome.jp/dbget-bin/www_bget?ko:K03844
Cluster-29035.110868	0	0	0.03	0	0	0	0	0	1616	K03844	ALG11	alpha-1,2-mannosyltransferase	http://www.genome.jp/dbget-bin/www_bget?ko:K03844
Cluster-29035.151424	0	0	0	0	0	0	0	0	730	K03844	ALG11	alpha-1,2-mannosyltransferase	http://www.genome.jp/dbget-bin/www_bget?ko:K03844
Cluster-29035.131860	0	0	0	0	0	0	0	0	580	K03844	ALG11	alpha-1,2-mannosyltransferase	http://www.genome.jp/dbget-bin/www_bget?ko:K03844
Cluster-29035.86008	30.25	15.61	16.04	3.85	1.14	0.58	0.55	0.13	1509	K03844	ALG11	alpha-1,2-mannosyltransferase	http://www.genome.jp/dbget-bin/www_bget?ko:K03844
Cluster-29035.114215	0	0	0	0	0	0	0	0	1374	K03844	ALG11	alpha-1,2-mannosyltransferase	http://www.genome.jp/dbget-bin/www_bget?ko:K03844
Cluster-29035.151385	336.81	103.86	221.84	119.22	16.6	5.04	9.97	5.21	1213	K03844	ALG11	alpha-1,2-mannosyltransferase	http://www.genome.jp/dbget-bin/www_bget?ko:K03844
Cluster-29035.84804	0	0	0	0	0	0	0	0	678	K03844	ALG11	alpha-1,2-mannosyltransferase	http://www.genome.jp/dbget-bin/www_bget?ko:K03844
Cluster-29035.157764	0	7.03	6.34	12.41	0	1.2	0.98	1.88	528	K03844	ALG11	alpha-1,2-mannosyltransferase	http://www.genome.jp/dbget-bin/www_bget?ko:K03844
Cluster-29035.109695	0	4.97	0	25.65	0	0.18	0	0.86	1506	K03844	ALG11	alpha-1,2-mannosyltransferase	http://www.genome.jp/dbget-bin/www_bget?ko:K03844
Cluster-29035.42021	0	0	0	0	0	0	0	0	1488	K03844	ALG11	alpha-1,2-mannosyltransferase	http://www.genome.jp/dbget-bin/www_bget?ko:K03844
Cluster-29035.122633	37.17	0	30.43	0	1.7	0	1.27	0	1285	K03844	ALG11	alpha-1,2-mannosyltransferase	http://www.genome.jp/dbget-bin/www_bget?ko:K03844
Cluster-29035.157755	0	48.12	52.94	79.11	0	2.42	2.46	3.58	1180	K03844	ALG11	alpha-1,2-mannosyltransferase	http://www.genome.jp/dbget-bin/www_bget?ko:K03844
Cluster-29035.155545	0	12.48	0	0	0	0.54	0	0	1322	K03844	ALG11	alpha-1,2-mannosyltransferase	http://www.genome.jp/dbget-bin/www_bget?ko:K03844
Cluster-29035.111233	149.87	0	52.45	0	5.23	0	1.67	0	1611	K03844	ALG11	alpha-1,2-mannosyltransferase	http://www.genome.jp/dbget-bin/www_bget?ko:K03844
Cluster-29035.159371	55.77	0	25.38	0	7.78	0	3.22	0	590	K03844	ALG11	alpha-1,2-mannosyltransferase	http://www.genome.jp/dbget-bin/www_bget?ko:K03844
Cluster-29035.146606	2.81	0	0	0	0.1	0	0	0	1593	K03844	ALG11	alpha-1,2-mannosyltransferase	http://www.genome.jp/dbget-bin/www_bget?ko:K03844
Cluster-29035.35324	0	99.46	43.34	92.42	0	4.82	1.94	4.03	1215	K03844	ALG11	alpha-1,2-mannosyltransferase	http://www.genome.jp/dbget-bin/www_bget?ko:K03844
Cluster-29035.58952	36.53	0	31.45	0	1.62	0	1.27	0	1320	K03844	ALG11	alpha-1,2-mannosyltransferase	http://www.genome.jp/dbget-bin/www_bget?ko:K03844
Cluster-29035.84805	0	0	0	0	0	0	0	0	692	K03844	ALG11	alpha-1,2-mannosyltransferase	http://www.genome.jp/dbget-bin/www_bget?ko:K03844
Cluster-29035.157760	20.15	3.76	7.49	2.87	5.61	1.05	1.89	0.71	420	K03844	ALG11	alpha-1,2-mannosyltransferase	http://www.genome.jp/dbget-bin/www_bget?ko:K03844
Cluster-29035.157762	0	0	0	0	0	0	0	0	542	K03844	ALG11	alpha-1,2-mannosyltransferase	http://www.genome.jp/dbget-bin/www_bget?ko:K03844
Cluster-29035.157757	0	0	0	0	0	0	0	0	1475	K03844	ALG11	alpha-1,2-mannosyltransferase	http://www.genome.jp/dbget-bin/www_bget?ko:K03844
Cluster-29035.79876	73.51	16.37	42.85	30.91	3.55	0.78	1.88	1.32	1234	K03844	ALG11	alpha-1,2-mannosyltransferase	http://www.genome.jp/dbget-bin/www_bget?ko:K03844
Cluster-29035.157756	104.94	30.26	72.94	26.6	5.57	1.58	3.53	1.25	1144	K03844	ALG11	alpha-1,2-mannosyltransferase	http://www.genome.jp/dbget-bin/www_bget?ko:K03844
Cluster-29035.159370	0	0	0	0	0	0	0	0	1336	K03844	ALG11	alpha-1,2-mannosyltransferase	http://www.genome.jp/dbget-bin/www_bget?ko:K03844
Cluster-29035.146499	11.94	11.87	10.55	12.32	0.57	0.56	0.46	0.52	1241	K03843	ALG2	alpha-1,3/alpha-1,6-mannosyltransferase	http://www.genome.jp/dbget-bin/www_bget?ko:K03843
Cluster-29035.147263	22.31	8.48	30.52	6.81	2.43	0.92	3.03	0.66	685	K03843	ALG2	alpha-1,3/alpha-1,6-mannosyltransferase	http://www.genome.jp/dbget-bin/www_bget?ko:K03843
Cluster-29035.147267	13.85	7.02	12.56	21.28	0.62	0.31	0.51	0.84	1315	K03843	ALG2	alpha-1,3/alpha-1,6-mannosyltransferase	http://www.genome.jp/dbget-bin/www_bget?ko:K03843
Cluster-29035.146497	142.98	131.62	152.85	164.06	13.33	12.13	12.97	13.56	759	K03843	ALG2	alpha-1,3/alpha-1,6-mannosyltransferase	http://www.genome.jp/dbget-bin/www_bget?ko:K03843
Cluster-29035.147265	15.71	8.9	24.63	28.13	0.7	0.39	0.99	1.1	1322	K03843	ALG2	alpha-1,3/alpha-1,6-mannosyltransferase	http://www.genome.jp/dbget-bin/www_bget?ko:K03843
Cluster-29035.146496	0	0	0	0	0	0	0	0	1322	K03843	ALG2	alpha-1,3/alpha-1,6-mannosyltransferase	http://www.genome.jp/dbget-bin/www_bget?ko:K03843
Cluster-29035.147264	252.29	238.1	240.89	251.41	11.36	10.55	9.89	10.03	1304	K03843	ALG2	alpha-1,3/alpha-1,6-mannosyltransferase	http://www.genome.jp/dbget-bin/www_bget?ko:K03843
Cluster-29035.53517	24.86	0	8	0	2.01	0	0.59	0	836	K03845	ALG3	alpha-1,3-mannosyltransferase	http://www.genome.jp/dbget-bin/www_bget?ko:K03845
Cluster-29035.165951	129.82	0	80.77	0	4.34	0	2.46	0	1671	K03845	ALG3	alpha-1,3-mannosyltransferase	http://www.genome.jp/dbget-bin/www_bget?ko:K03845
Cluster-29035.179955	152.18	286	188.23	274	5.08	9.38	5.73	8.09	1673	K03845	ALG3	alpha-1,3-mannosyltransferase	http://www.genome.jp/dbget-bin/www_bget?ko:K03845
Cluster-29035.200482	0	0	0	0	0	0	0	0	1105	K03847	ALG12	alpha-1,6-mannosyltransferase	http://www.genome.jp/dbget-bin/www_bget?ko:K03847
Cluster-29035.200488	0	9.94	0	20.12	0	0.53	0	0.96	1129	K03847	ALG12	alpha-1,6-mannosyltransferase	http://www.genome.jp/dbget-bin/www_bget?ko:K03847
Cluster-29035.200487	0	0.06	8.71	0	0	0	0.43	0	1116	K03847	ALG12	alpha-1,6-mannosyltransferase	http://www.genome.jp/dbget-bin/www_bget?ko:K03847
Cluster-29035.200481	5.47	4.49	3.13	2.17	0.38	0.31	0.2	0.13	931	K03847	ALG12	alpha-1,6-mannosyltransferase	http://www.genome.jp/dbget-bin/www_bget?ko:K03847
Cluster-29035.200489	82.72	87.47	116.07	108.35	6.42	6.7	8.2	7.45	862	K03847	ALG12	alpha-1,6-mannosyltransferase	http://www.genome.jp/dbget-bin/www_bget?ko:K03847
Cluster-29035.194972	37	35	58	35	10.43	9.95	14.78	8.77	418	K03847	ALG12	alpha-1,6-mannosyltransferase	http://www.genome.jp/dbget-bin/www_bget?ko:K03847
Cluster-29035.46854	69	0	32	0	29.19	0	12.19	0	361	K03847	ALG12	alpha-1,6-mannosyltransferase	http://www.genome.jp/dbget-bin/www_bget?ko:K03847
Cluster-29035.12400	0	4	1	0.99	0	12.38	2.35	2.39	244	K03847	ALG12	alpha-1,6-mannosyltransferase	http://www.genome.jp/dbget-bin/www_bget?ko:K03847
Cluster-29035.3281	0	0	0	0	0	0	0	0	205	K03847	ALG12	alpha-1,6-mannosyltransferase	http://www.genome.jp/dbget-bin/www_bget?ko:K03847
Cluster-29035.206013	5.58	0	10.36	0	0.44	0	0.75	0	851	K03847	ALG12	alpha-1,6-mannosyltransferase	http://www.genome.jp/dbget-bin/www_bget?ko:K03847
Cluster-29035.200484	33.23	9.04	13.74	15.36	2.52	0.68	0.95	1.03	875	K03847	ALG12	alpha-1,6-mannosyltransferase	http://www.genome.jp/dbget-bin/www_bget?ko:K03847
Cluster-29035.194971	2	12	14	11	1.05	6.52	6.62	5.16	338	K03847	ALG12	alpha-1,6-mannosyltransferase	http://www.genome.jp/dbget-bin/www_bget?ko:K03847
Cluster-29035.49179	95.25	33.14	82.42	57.38	6.41	2.2	5.05	3.42	955	K03842	ALG1	beta-1,4-mannosyltransferase	http://www.genome.jp/dbget-bin/www_bget?ko:K03842
Cluster-29035.61762	0	2.65	5.35	0	0	0.18	0.33	0	949	K03842	ALG1	beta-1,4-mannosyltransferase	http://www.genome.jp/dbget-bin/www_bget?ko:K03842
Cluster-25113.0	1.64	2.46	0	0	0.13	0.19	0	0	850	K03842	ALG1	beta-1,4-mannosyltransferase	http://www.genome.jp/dbget-bin/www_bget?ko:K03842
Cluster-29035.13064	0	41.62	11	30.06	0	4.05	0.98	2.62	733	K03842	ALG1	beta-1,4-mannosyltransferase	http://www.genome.jp/dbget-bin/www_bget?ko:K03842
Cluster-29035.185526	0	11.38	0	2.94	0	0.72	0	0.17	994	K03842	ALG1	beta-1,4-mannosyltransferase	http://www.genome.jp/dbget-bin/www_bget?ko:K03842
Cluster-29035.123167	21.76	0	10.34	0	0.66	0	0.29	0	1804	K03842	ALG1	beta-1,4-mannosyltransferase	http://www.genome.jp/dbget-bin/www_bget?ko:K03842
Cluster-29035.49180	0	13.76	19.95	9.91	0	1.47	1.95	0.95	691	K03842	ALG1	beta-1,4-mannosyltransferase	http://www.genome.jp/dbget-bin/www_bget?ko:K03842
Cluster-29035.75881	84.79	306.96	137.11	236.11	2.33	8.3	3.44	5.76	1974	K03842	ALG1	beta-1,4-mannosyltransferase	http://www.genome.jp/dbget-bin/www_bget?ko:K03842
Cluster-29035.44059	0	4.55	0	0	0	0.12	0	0	2062	K03842	ALG1	beta-1,4-mannosyltransferase	http://www.genome.jp/dbget-bin/www_bget?ko:K03842
Cluster-29035.51537	44.39	15.48	12.1	10.59	2.03	0.7	0.5	0.43	1287	K03842	ALG1	beta-1,4-mannosyltransferase	http://www.genome.jp/dbget-bin/www_bget?ko:K03842
Cluster-29035.181753	0.26	0	0	0	0.02	0	0	0	862	K03842	ALG1	beta-1,4-mannosyltransferase	http://www.genome.jp/dbget-bin/www_bget?ko:K03842
Cluster-29035.179078	5.18	0	0	0	0.46	0	0	0	786	K03842	ALG1	beta-1,4-mannosyltransferase	http://www.genome.jp/dbget-bin/www_bget?ko:K03842
Cluster-29035.65361	1.57	0	7.73	0	0.13	0	0.58	0	831	K03842	ALG1	beta-1,4-mannosyltransferase	http://www.genome.jp/dbget-bin/www_bget?ko:K03842
Cluster-29035.123168	470.88	0	240.99	0	15.25	0	7.12	0	1716	K03842	ALG1	beta-1,4-mannosyltransferase	http://www.genome.jp/dbget-bin/www_bget?ko:K03842
Cluster-29035.132479	201.15	0	81.83	0	26.45	0	9.78	0	611	K00721	DPM1	dolichol-phosphate mannosyltransferase	http://www.genome.jp/dbget-bin/www_bget?ko:K00721
Cluster-29035.132927	226.85	569	395.17	597	33.02	82.31	52.25	77.07	576	K00721	DPM1	dolichol-phosphate mannosyltransferase	http://www.genome.jp/dbget-bin/www_bget?ko:K00721
Cluster-29035.168242	20.19	0	0	0	0.45	0	0	0	2400	K00721	DPM1	dolichol-phosphate mannosyltransferase	http://www.genome.jp/dbget-bin/www_bget?ko:K00721
Cluster-29035.168247	61.49	0	29.65	0	1.21	0	0.53	0	2653	K00721	DPM1	dolichol-phosphate mannosyltransferase	http://www.genome.jp/dbget-bin/www_bget?ko:K00721
Cluster-29035.168244	0	11.53	20.65	5.89	0	0.27	0.44	0.12	2267	K00721	DPM1	dolichol-phosphate mannosyltransferase	http://www.genome.jp/dbget-bin/www_bget?ko:K00721
Cluster-29035.60708	0	5.45	0	0	0	0.13	0	0	2258	K00721	DPM1	dolichol-phosphate mannosyltransferase	http://www.genome.jp/dbget-bin/www_bget?ko:K00721
Cluster-29035.123493	0	38.49	0	0	0	0.82	0	0	2444	K00721	DPM1	dolichol-phosphate mannosyltransferase	http://www.genome.jp/dbget-bin/www_bget?ko:K00721
Cluster-29035.151567	0	0	0.16	0	0	0	0	0	2360	K00721	DPM1	dolichol-phosphate mannosyltransferase	http://www.genome.jp/dbget-bin/www_bget?ko:K00721
Cluster-29035.168245	6.31	0	0	0	0.14	0	0	0	2414	K00721	DPM1	dolichol-phosphate mannosyltransferase	http://www.genome.jp/dbget-bin/www_bget?ko:K00721
Cluster-29035.168240	50.99	0	88.79	0	1.16	0	1.85	0	2330	K00721	DPM1	dolichol-phosphate mannosyltransferase	http://www.genome.jp/dbget-bin/www_bget?ko:K00721
Cluster-29035.151568	0	123.28	80.1	149.13	0	2.77	1.67	3.03	2322	K00721	DPM1	dolichol-phosphate mannosyltransferase	http://www.genome.jp/dbget-bin/www_bget?ko:K00721
Cluster-29035.132928	0	0.23	49.44	55.12	0	0.01	1.04	1.12	2311	K00721	DPM1	dolichol-phosphate mannosyltransferase	http://www.genome.jp/dbget-bin/www_bget?ko:K00721
Cluster-29035.54162	130.79	206.64	159.18	315.78	3.14	4.87	3.49	6.71	2227	K00721	DPM1	dolichol-phosphate mannosyltransferase	http://www.genome.jp/dbget-bin/www_bget?ko:K00721
Cluster-29035.88038	0	29.41	33.66	0	0	0.52	0.55	0	2887	K00721	DPM1	dolichol-phosphate mannosyltransferase	http://www.genome.jp/dbget-bin/www_bget?ko:K00721
Cluster-29035.168246	40.71	23.44	0	62.47	0.74	0.42	0	1.01	2857	K00721	DPM1	dolichol-phosphate mannosyltransferase	http://www.genome.jp/dbget-bin/www_bget?ko:K00721
Cluster-29035.53057	9	13	8	6	14.56	23.57	11.54	8.76	264	K09658	DPM2	dolichyl-phosphate mannosyltransferase polypeptide 2, regulatory subunit	http://www.genome.jp/dbget-bin/www_bget?ko:K09658
Cluster-29035.53059	0	0	0	0	0	0	0	0	1194	K09658	DPM2	dolichyl-phosphate mannosyltransferase polypeptide 2, regulatory subunit	http://www.genome.jp/dbget-bin/www_bget?ko:K09658
Cluster-29035.53058	0	30.07	6.99	22.95	0	1.51	0.32	1.04	1182	K09658	DPM2	dolichyl-phosphate mannosyltransferase polypeptide 2, regulatory subunit	http://www.genome.jp/dbget-bin/www_bget?ko:K09658
Cluster-29035.53054	363.93	354.8	297.45	416.81	38.64	37.29	28.73	39.23	697	K09658	DPM2	dolichyl-phosphate mannosyltransferase polypeptide 2, regulatory subunit	http://www.genome.jp/dbget-bin/www_bget?ko:K09658
Cluster-29035.117999	11.37	0	3.82	0	2.48	0	0.76	0	467	K09658	DPM2	dolichyl-phosphate mannosyltransferase polypeptide 2, regulatory subunit	http://www.genome.jp/dbget-bin/www_bget?ko:K09658
Cluster-29035.53056	20.01	0	9.96	0	0.99	0	0.45	0	1213	K09658	DPM2	dolichyl-phosphate mannosyltransferase polypeptide 2, regulatory subunit	http://www.genome.jp/dbget-bin/www_bget?ko:K09658
Cluster-29035.53055	0	7.13	13.33	7.25	0	0.35	0.61	0.32	1201	K09658	DPM2	dolichyl-phosphate mannosyltransferase polypeptide 2, regulatory subunit	http://www.genome.jp/dbget-bin/www_bget?ko:K09658
Cluster-29035.77213	107.9	84.06	65.16	83.4	8.31	6.39	4.57	5.69	866	K09659	DPM3	dolichyl-phosphate mannosyltransferase polypeptide 3	http://www.genome.jp/dbget-bin/www_bget?ko:K09659
Cluster-29035.80520	0	0	0	0	0	0	0	0	678	K09659	DPM3	dolichyl-phosphate mannosyltransferase polypeptide 3	http://www.genome.jp/dbget-bin/www_bget?ko:K09659
Cluster-29035.171701	17.85	124.94	51.28	92.6	1.32	9.14	3.46	6.09	890	K09659	DPM3	dolichyl-phosphate mannosyltransferase polypeptide 3	http://www.genome.jp/dbget-bin/www_bget?ko:K09659
Cluster-29035.80600	22.25	0	10.57	0	2.33	0	1.01	0	703	K09659	DPM3	dolichyl-phosphate mannosyltransferase polypeptide 3	http://www.genome.jp/dbget-bin/www_bget?ko:K09659
Xylosyltransferase
Cluster-29035.60494	39.46	84.33	52.76	61.39	2.32	4.88	2.82	3.19	1058	K03714	E2.4.2.38	glycoprotein 2-beta-D-xylosyltransferase	http://www.genome.jp/dbget-bin/www_bget?ko:K03714
Cluster-29035.165097	62.78	19.66	48.69	0	2.23	0.69	1.58	0	1587	K03714	E2.4.2.38	glycoprotein 2-beta-D-xylosyltransferase	http://www.genome.jp/dbget-bin/www_bget?ko:K03714
Cluster-29035.76650	16.4	3.66	22.29	7.5	0.42	0.09	0.52	0.17	2090	K03714	E2.4.2.38	glycoprotein 2-beta-D-xylosyltransferase	http://www.genome.jp/dbget-bin/www_bget?ko:K03714
Cluster-29035.165092	233.02	121.8	202.69	133.69	6	3.08	4.76	3.05	2092	K03714	E2.4.2.38	glycoprotein 2-beta-D-xylosyltransferase	http://www.genome.jp/dbget-bin/www_bget?ko:K03714
Cluster-29035.76651	308.13	314.01	381.95	354.11	4.47	4.47	5.06	4.55	3523	K03714	E2.4.2.38	glycoprotein 2-beta-D-xylosyltransferase	http://www.genome.jp/dbget-bin/www_bget?ko:K03714
Cluster-29035.165095	9.2	100.54	38.62	105.31	0.31	3.35	1.2	3.17	1648	K03714	E2.4.2.38	glycoprotein 2-beta-D-xylosyltransferase	http://www.genome.jp/dbget-bin/www_bget?ko:K03714
Cluster-29035.148034	13.88	28.92	0	64.37	0.34	0.69	0	1.38	2216	K00771	XYLT	protein xylosyltransferase	http://www.genome.jp/dbget-bin/www_bget?ko:K00771
Cluster-29035.59828	26.01	0	50.36	0	1.76	0	3.1	0	953	K00771	XYLT	protein xylosyltransferase	http://www.genome.jp/dbget-bin/www_bget?ko:K00771
Cluster-29035.129965	0	0	28.46	0	0	0	1.23	0	1252	K00771	XYLT	protein xylosyltransferase	http://www.genome.jp/dbget-bin/www_bget?ko:K00771
Cluster-29035.129964	392.5	384.08	461.19	480.63	11.18	10.74	11.98	12.12	1917	K00771	XYLT	protein xylosyltransferase	http://www.genome.jp/dbget-bin/www_bget?ko:K00771
Cluster-29035.53326	4	0	3	3	0.58	0	0.39	0.38	578	K11714	RGXT	rhamnogalacturonan II specific xylosyltransferase	http://www.genome.jp/dbget-bin/www_bget?ko:K11714
Cluster-29035.53324	32.55	0	28.18	1	5.38	0	4.23	0.15	537	K11714	RGXT	rhamnogalacturonan II specific xylosyltransferase	http://www.genome.jp/dbget-bin/www_bget?ko:K11714
Cluster-29035.53325	46.89	68.45	49.03	70.02	8.21	11.94	7.79	10.88	521	K11714	RGXT	rhamnogalacturonan II specific xylosyltransferase	http://www.genome.jp/dbget-bin/www_bget?ko:K11714
Cluster-29035.99156	89.05	29.49	57.15	39.31	11.09	3.64	6.47	4.34	631	K11714	RGXT	rhamnogalacturonan II specific xylosyltransferase	http://www.genome.jp/dbget-bin/www_bget?ko:K11714
Cluster-29035.99157	51.95	91.51	85.85	115.69	7.27	12.72	10.92	14.36	589	K11714	RGXT	rhamnogalacturonan II specific xylosyltransferase	http://www.genome.jp/dbget-bin/www_bget?ko:K11714
Cluster-9449.4	0	0	0	0	0	0	0	0	252	K18789	XGD1	xylogalacturonan beta-1,3-xylosyltransferase	http://www.genome.jp/dbget-bin/www_bget?ko:K18789
Cluster-9449.6	0	2	14.32	11.93	0	0.09	0.61	0.49	1264	K18789	XGD1	xylogalacturonan beta-1,3-xylosyltransferase	http://www.genome.jp/dbget-bin/www_bget?ko:K18789
Cluster-9449.1	0	0	2.2	0	0	0	0.18	0	790	K18789	XGD1	xylogalacturonan beta-1,3-xylosyltransferase	http://www.genome.jp/dbget-bin/www_bget?ko:K18789
Cluster-9449.5	1	0	8.2	0	0.12	0	0.91	0	638	K18789	XGD1	xylogalacturonan beta-1,3-xylosyltransferase	http://www.genome.jp/dbget-bin/www_bget?ko:K18789
Cluster-9449.2	0	2	0	3	0	0.26	0	0.35	613	K18789	XGD1	xylogalacturonan beta-1,3-xylosyltransferase	http://www.genome.jp/dbget-bin/www_bget?ko:K18789
Cluster-9449.3	1	0	12.59	0	0.15	0	1.76	0	559	K18789	XGD1	xylogalacturonan beta-1,3-xylosyltransferase	http://www.genome.jp/dbget-bin/www_bget?ko:K18789
Cluster-3726.0	0	0	9.68	6.07	0	0	0.46	0.28	1163	K18789	XGD1	xylogalacturonan beta-1,3-xylosyltransferase	http://www.genome.jp/dbget-bin/www_bget?ko:K18789
Cluster-9449.0	0	0	0	0	0	0	0	0	259	K18789	XGD1	xylogalacturonan beta-1,3-xylosyltransferase	http://www.genome.jp/dbget-bin/www_bget?ko:K18789
Cluster-29035.86297	324	348	252	269	9.74	10.28	6.91	7.16	1829	K08238	XXT	xyloglucan 6-xylosyltransferase	http://www.genome.jp/dbget-bin/www_bget?ko:K08238
Cluster-29035.92502	585.36	989	855.35	1177.02	17.53	29.1	23.36	31.22	1835	K08238	XXT	xyloglucan 6-xylosyltransferase	http://www.genome.jp/dbget-bin/www_bget?ko:K08238
Cluster-29035.112996	1233	1154	1178	840	44.31	40.76	38.6	26.73	1571	K08238	XXT	xyloglucan 6-xylosyltransferase	http://www.genome.jp/dbget-bin/www_bget?ko:K08238
Fucosyltransferase
Cluster-29035.4567	0	27	10	25	0	5.33	1.79	4.39	490	K14412	FUT13, FucTC	alpha-1,4-fucosyltransferase	http://www.genome.jp/dbget-bin/www_bget?ko:K14412
Cluster-29035.133583	0	116.17	35.14	60.73	0	4.02	1.13	1.9	1597	K14412	FUT13, FucTC	alpha-1,4-fucosyltransferase	http://www.genome.jp/dbget-bin/www_bget?ko:K14412
Cluster-29035.88802	15.29	0	85.49	0	0.53	0	2.69	0	1627	K14412	FUT13, FucTC	alpha-1,4-fucosyltransferase	http://www.genome.jp/dbget-bin/www_bget?ko:K14412
Cluster-29035.106276	199.15	50.26	52.56	33.15	7.88	1.96	1.9	1.16	1449	K14412	FUT13, FucTC	alpha-1,4-fucosyltransferase	http://www.genome.jp/dbget-bin/www_bget?ko:K14412
Cluster-29035.122809	12.22	0	0	0	0.44	0	0	0	1579	K14412	FUT13, FucTC	alpha-1,4-fucosyltransferase	http://www.genome.jp/dbget-bin/www_bget?ko:K14412
Cluster-29035.130024	194.17	0	41.76	0	6.78	0	1.33	0	1609	K14412	FUT13, FucTC	alpha-1,4-fucosyltransferase	http://www.genome.jp/dbget-bin/www_bget?ko:K14412
Cluster-29035.97986	23.17	188.57	134.05	209.11	0.93	7.45	4.91	7.44	1431	K14412	FUT13, FucTC	alpha-1,4-fucosyltransferase	http://www.genome.jp/dbget-bin/www_bget?ko:K14412
Cluster-29035.204119	0	1.68	3.42	14.26	0	0.04	0.08	0.33	2047	K00753	E2.4.1.214	glycoprotein 3-alpha-L-fucosyltransferase	http://www.genome.jp/dbget-bin/www_bget?ko:K00753
Cluster-29035.198770	33.32	51.77	40.87	31.36	0.89	1.35	0.99	0.74	2037	K00753	E2.4.1.214	glycoprotein 3-alpha-L-fucosyltransferase	http://www.genome.jp/dbget-bin/www_bget?ko:K00753
Cluster-29035.204120	14.76	36.78	16.68	33.52	1.42	3.49	1.46	2.85	745	K00753	E2.4.1.214	glycoprotein 3-alpha-L-fucosyltransferase	http://www.genome.jp/dbget-bin/www_bget?ko:K00753
Cluster-29035.65835	87.46	158.25	115.5	189.47	3.52	6.25	4.23	6.74	1431	K00753	E2.4.1.214	glycoprotein 3-alpha-L-fucosyltransferase	http://www.genome.jp/dbget-bin/www_bget?ko:K00753
Cluster-29035.204114	0	24.66	12.2	6	0	0.44	0.2	0.1	2861	K00753	E2.4.1.214	glycoprotein 3-alpha-L-fucosyltransferase	http://www.genome.jp/dbget-bin/www_bget?ko:K00753
Cluster-29035.204115	0	0	0	0	0	0	0	0	2934	K00753	E2.4.1.214	glycoprotein 3-alpha-L-fucosyltransferase	http://www.genome.jp/dbget-bin/www_bget?ko:K00753
Cluster-29035.65836	316.31	447.23	458.44	426.2	8.23	11.42	10.88	9.82	2075	K00753	E2.4.1.214	glycoprotein 3-alpha-L-fucosyltransferase	http://www.genome.jp/dbget-bin/www_bget?ko:K00753
Cluster-29035.204117	47.69	104.43	84.11	102.66	1.01	2.17	1.63	1.93	2488	K00753	E2.4.1.214	glycoprotein 3-alpha-L-fucosyltransferase	http://www.genome.jp/dbget-bin/www_bget?ko:K00753
Cluster-29035.204116	41.23	14.67	14.72	15.2	0.75	0.26	0.25	0.25	2851	K00753	E2.4.1.214	glycoprotein 3-alpha-L-fucosyltransferase	http://www.genome.jp/dbget-bin/www_bget?ko:K00753
Cluster-21353.0	4	9	17	8	5.48	13.61	20.76	9.86	272	K03691	POFUT	peptide-O-fucosyltransferase	http://www.genome.jp/dbget-bin/www_bget?ko:K03691
Cluster-29035.184381	99	62.99	84.86	93.45	11.96	7.54	9.32	10.01	643	K03691	POFUT	peptide-O-fucosyltransferase	http://www.genome.jp/dbget-bin/www_bget?ko:K03691
Cluster-29035.212980	0	38.19	18.28	34.19	0	6.57	2.86	5.23	525	K03691	POFUT	peptide-O-fucosyltransferase	http://www.genome.jp/dbget-bin/www_bget?ko:K03691
Cluster-29035.123628	78	95.89	111.16	74.05	2.19	2.64	2.84	1.84	1943	K03691	POFUT	peptide-O-fucosyltransferase	http://www.genome.jp/dbget-bin/www_bget?ko:K03691
Cluster-29035.123622	338.87	311.45	435.65	464.34	11.19	10.1	13.12	13.57	1688	K03691	POFUT	peptide-O-fucosyltransferase	http://www.genome.jp/dbget-bin/www_bget?ko:K03691
Cluster-29035.123626	105.5	77.26	30.16	29.17	2.64	1.9	0.69	0.65	2147	K03691	POFUT	peptide-O-fucosyltransferase	http://www.genome.jp/dbget-bin/www_bget?ko:K03691
Cluster-29035.123625	16.02	137.52	61.54	137.03	0.49	4.17	1.73	3.74	1789	K03691	POFUT	peptide-O-fucosyltransferase	http://www.genome.jp/dbget-bin/www_bget?ko:K03691
Cluster-29035.123623	335.15	463.76	512.03	600.16	9.68	13.16	13.49	15.35	1893	K03691	POFUT	peptide-O-fucosyltransferase	http://www.genome.jp/dbget-bin/www_bget?ko:K03691
Cluster-29035.123624	61.18	0	41.44	7.38	2.56	0	1.58	0.27	1386	K03691	POFUT	peptide-O-fucosyltransferase	http://www.genome.jp/dbget-bin/www_bget?ko:K03691
Cluster-29035.123620	0.95	19.67	76.77	72.89	0.03	0.53	1.91	1.76	1991	K03691	POFUT	peptide-O-fucosyltransferase	http://www.genome.jp/dbget-bin/www_bget?ko:K03691
Cluster-29035.124034	245.32	313.27	314.11	329.33	7.83	9.83	9.15	9.31	1737	K03691	POFUT	peptide-O-fucosyltransferase	http://www.genome.jp/dbget-bin/www_bget?ko:K03691
Cluster-29035.79077	4.24	66.74	40.29	75.34	0.2	3.11	1.74	3.16	1253	K13681	FUT	xyloglucan fucosyltransferase	http://www.genome.jp/dbget-bin/www_bget?ko:K13681
Cluster-29035.121809	337.76	199.26	251.71	153.66	14.74	8.55	10.01	5.94	1338	K13681	FUT	xyloglucan fucosyltransferase	http://www.genome.jp/dbget-bin/www_bget?ko:K13681
galactosyltransferase
Cluster-29035.207610	7.96	0	0	0	0.27	0	0	0	1630	K00734	B3GALT6	galactosylxylosylprotein 3-beta-galactosyltransferase	http://www.genome.jp/dbget-bin/www_bget?ko:K00734
Cluster-29035.15630	1	0	3	0	0.12	0	0.33	0	638	K00734	B3GALT6	galactosylxylosylprotein 3-beta-galactosyltransferase	http://www.genome.jp/dbget-bin/www_bget?ko:K00734
Cluster-29035.181030	3.42	0.04	1.24	0.29	0.13	0	0.04	0.01	1537	K00734	B3GALT6	galactosylxylosylprotein 3-beta-galactosyltransferase	http://www.genome.jp/dbget-bin/www_bget?ko:K00734
Cluster-29035.184869	1.37	9.81	15.09	16.19	0.05	0.34	0.48	0.5	1615	K00734	B3GALT6	galactosylxylosylprotein 3-beta-galactosyltransferase	http://www.genome.jp/dbget-bin/www_bget?ko:K00734
Cluster-29035.181032	0	14.15	15.11	23.87	0	0.45	0.45	0.69	1705	K00734	B3GALT6	galactosylxylosylprotein 3-beta-galactosyltransferase	http://www.genome.jp/dbget-bin/www_bget?ko:K00734
Cluster-14719.0	0	0	0	3.21	0	0	0	0.11	1511	K18819	GOLS	inositol 3-alpha-galactosyltransferase	http://www.genome.jp/dbget-bin/www_bget?ko:K18819
Cluster-14719.1	0	4.32	0	5.2	0	0.15	0	0.16	1604	K18819	GOLS	inositol 3-alpha-galactosyltransferase	http://www.genome.jp/dbget-bin/www_bget?ko:K18819
Cluster-33400.0	1.82	12.04	7.1	6.08	0.05	0.36	0.2	0.16	1822	K18819	GOLS	inositol 3-alpha-galactosyltransferase	http://www.genome.jp/dbget-bin/www_bget?ko:K18819
Cluster-29035.60314	208.43	465.05	29.57	60.2	6.45	14.15	0.84	1.65	1783	K18819	GOLS	inositol 3-alpha-galactosyltransferase	http://www.genome.jp/dbget-bin/www_bget?ko:K18819
Cluster-29035.52248	121.35	123.5	184.3	29.58	3.9	3.9	5.41	0.84	1726	K18819	GOLS	inositol 3-alpha-galactosyltransferase	http://www.genome.jp/dbget-bin/www_bget?ko:K18819
Cluster-29035.167255	24.79	159.15	48.57	0.61	1.2	7.56	2.14	0.03	1234	K18819	GOLS	inositol 3-alpha-galactosyltransferase	http://www.genome.jp/dbget-bin/www_bget?ko:K18819
Cluster-29035.60313	0	0	26.78	53.29	0	0	1.25	2.42	1177	K18819	GOLS	inositol 3-alpha-galactosyltransferase	http://www.genome.jp/dbget-bin/www_bget?ko:K18819
Cluster-29035.176986	12.89	35.99	4.46	2.15	0.85	2.35	0.27	0.13	968	K18819	GOLS	inositol 3-alpha-galactosyltransferase	http://www.genome.jp/dbget-bin/www_bget?ko:K18819
Cluster-29035.52249	0	0	0.08	1.25	0	0	0	0.08	911	K18819	GOLS	inositol 3-alpha-galactosyltransferase	http://www.genome.jp/dbget-bin/www_bget?ko:K18819
Cluster-29035.52250	207.79	412.16	252.01	108.33	23.77	46.7	26.21	10.98	665	K18819	GOLS	inositol 3-alpha-galactosyltransferase	http://www.genome.jp/dbget-bin/www_bget?ko:K18819
Cluster-29035.60315	0	78.98	0	1.51	0	10.39	0	0.18	608	K18819	GOLS	inositol 3-alpha-galactosyltransferase	http://www.genome.jp/dbget-bin/www_bget?ko:K18819
Cluster-29035.177687	24.75	14.17	3.23	3.09	6.08	3.49	0.72	0.67	443	K18819	GOLS	inositol 3-alpha-galactosyltransferase	http://www.genome.jp/dbget-bin/www_bget?ko:K18819
Cluster-33400.2	19.71	34.59	16.75	21.8	0.47	0.82	0.37	0.46	2226	K18819	GOLS	inositol 3-alpha-galactosyltransferase	http://www.genome.jp/dbget-bin/www_bget?ko:K18819
Cluster-33400.1	32.47	10.06	51.15	41.71	0.82	0.25	1.18	0.93	2135	K18819	GOLS	inositol 3-alpha-galactosyltransferase	http://www.genome.jp/dbget-bin/www_bget?ko:K18819
Cluster-29035.71336	0	9.55	0	0	0	0.68	0	0	909	K14413	GALT1	beta-1,3-galactosyltransferase	http://www.genome.jp/dbget-bin/www_bget?ko:K14413
Cluster-29035.111877	12.64	2.31	10.94	6.99	1.34	0.24	1.05	0.66	699	K14413	GALT1	beta-1,3-galactosyltransferase	http://www.genome.jp/dbget-bin/www_bget?ko:K14413
Cluster-36251.0	1	0	1	0	1.09	0	0.98	0	284	K14413	GALT1	beta-1,3-galactosyltransferase	http://www.genome.jp/dbget-bin/www_bget?ko:K14413
Cluster-29035.71914	82.36	130.69	110.06	87.01	2.65	4.14	3.23	2.48	1723	K14413	GALT1	beta-1,3-galactosyltransferase	http://www.genome.jp/dbget-bin/www_bget?ko:K14413
Cluster-29035.176000	46	127	73	102	2.61	7.09	3.77	5.12	1087	K14413	GALT1	beta-1,3-galactosyltransferase	http://www.genome.jp/dbget-bin/www_bget?ko:K14413
Cluster-29035.71915	32.97	0	19.2	0	1.87	0	0.99	0	1087	K14413	GALT1	beta-1,3-galactosyltransferase	http://www.genome.jp/dbget-bin/www_bget?ko:K14413
Cluster-29035.206426	7.03	0	6.8	0	0.28	0	0.25	0	1447	K14413	GALT1	beta-1,3-galactosyltransferase	http://www.genome.jp/dbget-bin/www_bget?ko:K14413
Cluster-29035.118622	275	348	293	349	5.69	7.06	5.53	6.39	2546	K14413	GALT1	beta-1,3-galactosyltransferase	http://www.genome.jp/dbget-bin/www_bget?ko:K14413
Cluster-29035.142911	0	63.62	41.21	92.22	0	1.64	0.99	2.14	2059	K14413	GALT1	beta-1,3-galactosyltransferase	http://www.genome.jp/dbget-bin/www_bget?ko:K14413
Cluster-29035.71337	0	0	0	0	0	0	0	0	1318	K14413	GALT1	beta-1,3-galactosyltransferase	http://www.genome.jp/dbget-bin/www_bget?ko:K14413
Cluster-29035.71338	1	0	3	0	0.41	0	1.11	0	364	K14413	GALT1	beta-1,3-galactosyltransferase	http://www.genome.jp/dbget-bin/www_bget?ko:K14413
Cluster-29035.142912	41	22.06	11.55	21.31	1.06	0.56	0.27	0.49	2082	K14413	GALT1	beta-1,3-galactosyltransferase	http://www.genome.jp/dbget-bin/www_bget?ko:K14413
Cluster-29035.7787	0	6.31	7.23	10.46	0	0.27	0.29	0.41	1335	K14413	GALT1	beta-1,3-galactosyltransferase	http://www.genome.jp/dbget-bin/www_bget?ko:K14413
Cluster-29035.19224	35	24.36	167	198.8	1.18	0.81	5.15	5.95	1654	K03715	E2.4.1.46	1,2-diacylglycerol 3-beta-galactosyltransferase	http://www.genome.jp/dbget-bin/www_bget?ko:K03715
Cluster-29035.142193	185.29	485	413.33	482	5.31	13.66	10.81	12.23	1906	K03715	E2.4.1.46	1,2-diacylglycerol 3-beta-galactosyltransferase	http://www.genome.jp/dbget-bin/www_bget?ko:K03715
Cluster-29035.700	0	0	0	3.77	0	0	0	0.2	1032	K03715	E2.4.1.46	1,2-diacylglycerol 3-beta-galactosyltransferase	http://www.genome.jp/dbget-bin/www_bget?ko:K03715
Cluster-29035.222342	0	3.64	0	15.2	0	0.16	0	0.6	1320	K03715	E2.4.1.46	1,2-diacylglycerol 3-beta-galactosyltransferase	http://www.genome.jp/dbget-bin/www_bget?ko:K03715
Cluster-29035.6433	22	25	40	71.23	0.47	0.52	0.78	1.35	2473	K03715	E2.4.1.46	1,2-diacylglycerol 3-beta-galactosyltransferase	http://www.genome.jp/dbget-bin/www_bget?ko:K03715
Cluster-29035.71694	284.71	0	180.67	0	8.22	0	4.76	0	1895	K03715	E2.4.1.46	1,2-diacylglycerol 3-beta-galactosyltransferase	http://www.genome.jp/dbget-bin/www_bget?ko:K03715
Cluster-40543.0	1	3	1	0	0.07	0.22	0.07	0	890	K01988	A4GALT	lactosylceramide 4-alpha-galactosyltransferase	http://www.genome.jp/dbget-bin/www_bget?ko:K01988

## Sheet: E.g carbohydrate metabolism
gene_id	sample_fpkm(AP)	sample_fpkm(BP)	sample_fpkm(AD)	sample_fpkm(BD)	Gene Length	KO ID	KO Name	KO Description	Http Link
fructose and mannose metabolism
Cluster-29035.93802	25.96	17.33	81.74	78.42	1380	K00051	E1.1.1.82	malate dehydrogenase (NADP+)	http://www.genome.jp/dbget-bin/www_bget?ko:K00051
Cluster-29035.93806	3.22	2.89	10.51	7.82	1208	K00051	E1.1.1.82	malate dehydrogenase (NADP+)	http://www.genome.jp/dbget-bin/www_bget?ko:K00051
Cluster-29035.138298	0.53	2.57	0.93	2.55	1562	K00051	E1.1.1.82	malate dehydrogenase (NADP+)	http://www.genome.jp/dbget-bin/www_bget?ko:K00051
Cluster-29035.86464	1.7	0.24	0.79	0.61	1583	K00051	E1.1.1.82	malate dehydrogenase (NADP+)	http://www.genome.jp/dbget-bin/www_bget?ko:K00051
Cluster-29035.93805	0.37	0.07	0.13	0	1771	K00051	E1.1.1.82	malate dehydrogenase (NADP+)	http://www.genome.jp/dbget-bin/www_bget?ko:K00051
Cluster-29035.93804	0.07	0.36	0	0.98	1516	K00051	E1.1.1.82	malate dehydrogenase (NADP+)	http://www.genome.jp/dbget-bin/www_bget?ko:K00051
Cluster-29035.93807	9.51	6.01	31.23	25.45	2472	K00051	E1.1.1.82	malate dehydrogenase (NADP+)	http://www.genome.jp/dbget-bin/www_bget?ko:K00051
Cluster-29035.79475	0.02	0	1.58	0	1698	K00051	E1.1.1.82	malate dehydrogenase (NADP+)	http://www.genome.jp/dbget-bin/www_bget?ko:K00051
Cluster-29035.93803	0	0	0	0.27	1838	K00051	E1.1.1.82	malate dehydrogenase (NADP+)	http://www.genome.jp/dbget-bin/www_bget?ko:K00051
Galactose metabolism
Cluster-29035.140053	19.62	42.9	28.02	37.32	1090	K00052	leuB	3-isopropylmalate dehydrogenase	http://www.genome.jp/dbget-bin/www_bget?ko:K00052
Cluster-29035.123879	24.25	2.71	17.18	4.91	468	K00052	leuB	3-isopropylmalate dehydrogenase	http://www.genome.jp/dbget-bin/www_bget?ko:K00052
Cluster-29035.76887	2.55	6.09	3.9	3.25	1001	K00052	leuB	3-isopropylmalate dehydrogenase	http://www.genome.jp/dbget-bin/www_bget?ko:K00052
beta-mannan synthase
Cluster-29035.208286	0	0	0	0.1	937	K13680	CSLA	beta-mannan synthase	http://www.genome.jp/dbget-bin/www_bget?ko:K13680
Cluster-29035.86408	2.93	0.07	3.71	4.05	915	K13680	CSLA	beta-mannan synthase	http://www.genome.jp/dbget-bin/www_bget?ko:K13680
Cluster-29035.197766	0.43	0	0.45	0	909	K13680	CSLA	beta-mannan synthase	http://www.genome.jp/dbget-bin/www_bget?ko:K13680
Cluster-29035.202443	0.07	0	3.28	2.06	904	K13680	CSLA	beta-mannan synthase	http://www.genome.jp/dbget-bin/www_bget?ko:K13680
Cluster-29035.152778	0.17	0.24	0	0	1633	K13680	CSLA	beta-mannan synthase	http://www.genome.jp/dbget-bin/www_bget?ko:K13680
Cluster-29035.203301	0	0	0.79	1.17	783	K13680	CSLA	beta-mannan synthase	http://www.genome.jp/dbget-bin/www_bget?ko:K13680
Cluster-29035.12148	0.86	0	0.54	0.69	1849	K13680	CSLA	beta-mannan synthase	http://www.genome.jp/dbget-bin/www_bget?ko:K13680
Cluster-29035.155440	21.96	2.83	13.39	8.09	644	K13680	CSLA	beta-mannan synthase	http://www.genome.jp/dbget-bin/www_bget?ko:K13680
Cluster-29035.202442	0.48	0	11.61	11.85	644	K13680	CSLA	beta-mannan synthase	http://www.genome.jp/dbget-bin/www_bget?ko:K13680
Cluster-29035.35350	0	0	0	0.19	642	K13680	CSLA	beta-mannan synthase	http://www.genome.jp/dbget-bin/www_bget?ko:K13680
Cluster-29035.199139	0	0	0.75	0.69	636	K13680	CSLA	beta-mannan synthase	http://www.genome.jp/dbget-bin/www_bget?ko:K13680
Cluster-29035.136555	10.82	8.92	8.57	7.81	557	K13680	CSLA	beta-mannan synthase	http://www.genome.jp/dbget-bin/www_bget?ko:K13680
Cluster-37971.1	0.68	0.27	0.36	0.1	1084	K13680	CSLA	beta-mannan synthase	http://www.genome.jp/dbget-bin/www_bget?ko:K13680
Cluster-29035.31738	0	0	0	7.63	242	K13680	CSLA	beta-mannan synthase	http://www.genome.jp/dbget-bin/www_bget?ko:K13680
Cluster-29035.192499	0.54	1.53	30.25	76.52	558	K13680	CSLA	beta-mannan synthase	http://www.genome.jp/dbget-bin/www_bget?ko:K13680
Cluster-29035.192501	0.54	0	7.52	0	558	K13680	CSLA	beta-mannan synthase	http://www.genome.jp/dbget-bin/www_bget?ko:K13680
Cluster-29035.146342	1.04	0	0.21	0	1546	K13680	CSLA	beta-mannan synthase	http://www.genome.jp/dbget-bin/www_bget?ko:K13680
Cluster-29035.136558	4.61	5.45	3.16	3.66	1532	K13680	CSLA	beta-mannan synthase	http://www.genome.jp/dbget-bin/www_bget?ko:K13680
Cluster-29035.161579	0.91	0	0.1	0	1507	K13680	CSLA	beta-mannan synthase	http://www.genome.jp/dbget-bin/www_bget?ko:K13680
Cluster-29035.136559	2.03	2.44	2.35	0	1493	K13680	CSLA	beta-mannan synthase	http://www.genome.jp/dbget-bin/www_bget?ko:K13680
Cluster-29035.70207	0.67	0	0.02	0	1485	K13680	CSLA	beta-mannan synthase	http://www.genome.jp/dbget-bin/www_bget?ko:K13680
Cluster-29035.152780	0.26	0.15	0	0	1474	K13680	CSLA	beta-mannan synthase	http://www.genome.jp/dbget-bin/www_bget?ko:K13680
Cluster-29035.70209	0	0.11	0	0	1422	K13680	CSLA	beta-mannan synthase	http://www.genome.jp/dbget-bin/www_bget?ko:K13680
Cluster-29035.70211	14.88	0	4.97	0	1413	K13680	CSLA	beta-mannan synthase	http://www.genome.jp/dbget-bin/www_bget?ko:K13680
Cluster-29035.79860	0	0	0	0	1399	K13680	CSLA	beta-mannan synthase	http://www.genome.jp/dbget-bin/www_bget?ko:K13680
Cluster-29035.97948	9.2	13.25	16.2	31.3	1350	K13680	CSLA	beta-mannan synthase	http://www.genome.jp/dbget-bin/www_bget?ko:K13680
Cluster-29035.189160	0	0	1.52	1	1677	K13680	CSLA	beta-mannan synthase	http://www.genome.jp/dbget-bin/www_bget?ko:K13680
Cluster-29035.79859	0	0	0	0.63	1335	K13680	CSLA	beta-mannan synthase	http://www.genome.jp/dbget-bin/www_bget?ko:K13680
Cluster-29035.201160	0	0	0.25	0	1289	K13680	CSLA	beta-mannan synthase	http://www.genome.jp/dbget-bin/www_bget?ko:K13680
Cluster-29035.79854	0.32	0.15	0	0.18	1281	K13680	CSLA	beta-mannan synthase	http://www.genome.jp/dbget-bin/www_bget?ko:K13680
Cluster-29035.5949	0	0	0.11	0	1928	K13680	CSLA	beta-mannan synthase	http://www.genome.jp/dbget-bin/www_bget?ko:K13680
Cluster-29035.178956	0	0	0.41	0	1214	K13680	CSLA	beta-mannan synthase	http://www.genome.jp/dbget-bin/www_bget?ko:K13680
Cluster-29035.152779	0.3	0	0	0.17	1101	K13680	CSLA	beta-mannan synthase	http://www.genome.jp/dbget-bin/www_bget?ko:K13680
Cluster-29035.202445	3.83	0	1.39	1.22	697	K13680	CSLA	beta-mannan synthase	http://www.genome.jp/dbget-bin/www_bget?ko:K13680
Cluster-29035.35349	0	0	0.25	0.94	1093	K13680	CSLA	beta-mannan synthase	http://www.genome.jp/dbget-bin/www_bget?ko:K13680
Cluster-29035.176801	0	0	0	0	1075	K13680	CSLA	beta-mannan synthase	http://www.genome.jp/dbget-bin/www_bget?ko:K13680
Cluster-29035.2676	0	0.59	0.6	1.04	1865	K13680	CSLA	beta-mannan synthase	http://www.genome.jp/dbget-bin/www_bget?ko:K13680
Cluster-29035.34546	0.78	0	8.37	11.97	735	K13680	CSLA	beta-mannan synthase	http://www.genome.jp/dbget-bin/www_bget?ko:K13680
Cluster-29035.192500	3.24	3.08	48.54	123.14	572	K13680	CSLA	beta-mannan synthase	http://www.genome.jp/dbget-bin/www_bget?ko:K13680
Cluster-29035.87393	0.38	0	4.1	0	502	K13680	CSLA	beta-mannan synthase	http://www.genome.jp/dbget-bin/www_bget?ko:K13680
Cluster-29035.202444	1.56	0	3.86	4.16	371	K13680	CSLA	beta-mannan synthase	http://www.genome.jp/dbget-bin/www_bget?ko:K13680
Cluster-29035.192497	0	0	1.58	3.14	360	K13680	CSLA	beta-mannan synthase	http://www.genome.jp/dbget-bin/www_bget?ko:K13680
Cluster-29035.192507	0	0	10.79	7.17	317	K13680	CSLA	beta-mannan synthase	http://www.genome.jp/dbget-bin/www_bget?ko:K13680
Cluster-29035.202441	0	0	3.74	4.97	314	K13680	CSLA	beta-mannan synthase	http://www.genome.jp/dbget-bin/www_bget?ko:K13680
Cluster-29035.222321	0	1.66	1.19	1.4	305	K13680	CSLA	beta-mannan synthase	http://www.genome.jp/dbget-bin/www_bget?ko:K13680
Cluster-29035.192498	2.61	2.78	74.68	151.87	298	K13680	CSLA	beta-mannan synthase	http://www.genome.jp/dbget-bin/www_bget?ko:K13680
Cluster-29035.103138	0.34	0.89	1.8	1.72	2141	K13680	CSLA	beta-mannan synthase	http://www.genome.jp/dbget-bin/www_bget?ko:K13680
Cluster-29035.97932	0	0	1.17	0.5	1334	K13680	CSLA	beta-mannan synthase	http://www.genome.jp/dbget-bin/www_bget?ko:K13680
Cluster-29035.70212	0.05	0	0.48	0	1568	K13680	CSLA	beta-mannan synthase	http://www.genome.jp/dbget-bin/www_bget?ko:K13680
Cluster-29035.142694	0.61	0	0.77	0.89	1496	K13680	CSLA	beta-mannan synthase	http://www.genome.jp/dbget-bin/www_bget?ko:K13680
Cluster-29035.155441	0	0.15	0.26	0	739	K13680	CSLA	beta-mannan synthase	http://www.genome.jp/dbget-bin/www_bget?ko:K13680
Cluster-29035.79852	15.22	15.61	17.05	9.95	749	K13680	CSLA	beta-mannan synthase	http://www.genome.jp/dbget-bin/www_bget?ko:K13680
Cluster-29035.176800	0.62	0	0	1.58	418	K13680	CSLA	beta-mannan synthase	http://www.genome.jp/dbget-bin/www_bget?ko:K13680
Cluster-29035.192506	0.11	0.05	14.74	10.6	1134	K13680	CSLA	beta-mannan synthase	http://www.genome.jp/dbget-bin/www_bget?ko:K13680
Cluster-29035.192492	0	0	0.42	0	746	K13680	CSLA	beta-mannan synthase	http://www.genome.jp/dbget-bin/www_bget?ko:K13680
Cluster-29035.193859	0	0	0	0	258	K13680	CSLA	beta-mannan synthase	http://www.genome.jp/dbget-bin/www_bget?ko:K13680
Cluster-29035.201097	0	0	0.39	0.35	1233	K13680	CSLA	beta-mannan synthase	http://www.genome.jp/dbget-bin/www_bget?ko:K13680
Cluster-29035.133465	0	0.71	0.03	1.12	1638	K13680	CSLA	beta-mannan synthase	http://www.genome.jp/dbget-bin/www_bget?ko:K13680
Cluster-29035.79853	11.59	20.98	10.95	10.84	1240	K13680	CSLA	beta-mannan synthase	http://www.genome.jp/dbget-bin/www_bget?ko:K13680
Cluster-29035.128933	0.46	0.13	0.09	0	2315	K13680	CSLA	beta-mannan synthase	http://www.genome.jp/dbget-bin/www_bget?ko:K13680
Cluster-29035.23153	0	0	0	0	1656	K13680	CSLA	beta-mannan synthase	http://www.genome.jp/dbget-bin/www_bget?ko:K13680
Cluster-29035.53014	0.02	0	0.02	0	1638	K13680	CSLA	beta-mannan synthase	http://www.genome.jp/dbget-bin/www_bget?ko:K13680
Cluster-29035.224950	0	0	0.31	0.1	1317	K13680	CSLA	beta-mannan synthase	http://www.genome.jp/dbget-bin/www_bget?ko:K13680
Cluster-29035.136560	0.22	0.43	0.51	0.2	1624	K13680	CSLA	beta-mannan synthase	http://www.genome.jp/dbget-bin/www_bget?ko:K13680
Cluster-29035.97947	34.58	15.13	32.13	44.85	1447	K13680	CSLA	beta-mannan synthase	http://www.genome.jp/dbget-bin/www_bget?ko:K13680
Cluster-29035.167719	0	0	0	0	970	K13680	CSLA	beta-mannan synthase	http://www.genome.jp/dbget-bin/www_bget?ko:K13680
Cluster-29035.34055	0	0.11	2.19	2.55	942	K13680	CSLA	beta-mannan synthase	http://www.genome.jp/dbget-bin/www_bget?ko:K13680
Cluster-29035.192441	0.7	0	0.3	0	1561	K13680	CSLA	beta-mannan synthase	http://www.genome.jp/dbget-bin/www_bget?ko:K13680
Cluster-29035.37321	0.12	0	0.04	0	1543	K13680	CSLA	beta-mannan synthase	http://www.genome.jp/dbget-bin/www_bget?ko:K13680
Cluster-29035.213809	0.61	1.32	0.94	0.92	1529	K13680	CSLA	beta-mannan synthase	http://www.genome.jp/dbget-bin/www_bget?ko:K13680
Cluster-29035.161873	0	0	0.08	0.15	1158	K13680	CSLA	beta-mannan synthase	http://www.genome.jp/dbget-bin/www_bget?ko:K13680
Cluster-29035.170418	0	0	0	0	1111	K13680	CSLA	beta-mannan synthase	http://www.genome.jp/dbget-bin/www_bget?ko:K13680
Cluster-29035.70208	0.12	0.41	0	0	1048	K13680	CSLA	beta-mannan synthase	http://www.genome.jp/dbget-bin/www_bget?ko:K13680
Cluster-29035.34513	0	0	0	0	1019	K13680	CSLA	beta-mannan synthase	http://www.genome.jp/dbget-bin/www_bget?ko:K13680
Cluster-29035.192153	0	0.07	0.98	1.9	534	K13680	CSLA	beta-mannan synthase	http://www.genome.jp/dbget-bin/www_bget?ko:K13680
Cluster-29035.158619	1.49	0	1.45	0.29	654	K13680	CSLA	beta-mannan synthase	http://www.genome.jp/dbget-bin/www_bget?ko:K13680
Cluster-29035.202212	0	0	0	0.95	346	K13680	CSLA	beta-mannan synthase	http://www.genome.jp/dbget-bin/www_bget?ko:K13680
Cluster-29035.29376	0	0.37	2.88	6.63	504	K13680	CSLA	beta-mannan synthase	http://www.genome.jp/dbget-bin/www_bget?ko:K13680
Cluster-29035.190181	0	0	5.17	0	2344	K13680	CSLA	beta-mannan synthase	http://www.genome.jp/dbget-bin/www_bget?ko:K13680
Cluster-29035.190180	1.02	0	17.59	0	2388	K13680	CSLA	beta-mannan synthase	http://www.genome.jp/dbget-bin/www_bget?ko:K13680
Cluster-7896.0	0	1.05	0	0.47	580	K13680	CSLA	beta-mannan synthase	http://www.genome.jp/dbget-bin/www_bget?ko:K13680
Cluster-37971.0	0.82	1.12	0.68	0.57	2039	K13680	CSLA	beta-mannan synthase	http://www.genome.jp/dbget-bin/www_bget?ko:K13680
Cluster-29035.70210	2.04	0	2.16	2.38	391	K13680	CSLA	beta-mannan synthase	http://www.genome.jp/dbget-bin/www_bget?ko:K13680
Cluster-29035.192503	0	0	0	0.34	1360	K13680	CSLA	beta-mannan synthase	http://www.genome.jp/dbget-bin/www_bget?ko:K13680
Cluster-29035.192502	0	0	0.88	0.79	1397	K13680	CSLA	beta-mannan synthase	http://www.genome.jp/dbget-bin/www_bget?ko:K13680
Cluster-29035.99424	7.47	6.48	11.48	12.86	2092	K13680	CSLA	beta-mannan synthase	http://www.genome.jp/dbget-bin/www_bget?ko:K13680
Cluster-29035.148364	0	0	0	0	2506	K13680	CSLA	beta-mannan synthase	http://www.genome.jp/dbget-bin/www_bget?ko:K13680
Cluster-29035.94629	0.1	0.13	0	0	2364	K13680	CSLA	beta-mannan synthase	http://www.genome.jp/dbget-bin/www_bget?ko:K13680
Cluster-29035.157541	0.38	0.52	0.62	0.42	2317	K13680	CSLA	beta-mannan synthase	http://www.genome.jp/dbget-bin/www_bget?ko:K13680
Cluster-29035.220794	0.31	0.83	0.66	0.87	1389	K13680	CSLA	beta-mannan synthase	http://www.genome.jp/dbget-bin/www_bget?ko:K13680
Cluster-29035.135010	0.37	0	0	0	1629	K13680	CSLA	beta-mannan synthase	http://www.genome.jp/dbget-bin/www_bget?ko:K13680
Cluster-29035.192496	0.54	0.54	5.34	23.29	2297	K13680	CSLA	beta-mannan synthase	http://www.genome.jp/dbget-bin/www_bget?ko:K13680
Cluster-29035.193825	0	0.38	1.47	34.85	2253	K13680	CSLA	beta-mannan synthase	http://www.genome.jp/dbget-bin/www_bget?ko:K13680
Cluster-29035.192494	0.05	0.01	0.12	0	2491	K13680	CSLA	beta-mannan synthase	http://www.genome.jp/dbget-bin/www_bget?ko:K13680
Cluster-29035.192504	0	0.08	0	2.57	2447	K13680	CSLA	beta-mannan synthase	http://www.genome.jp/dbget-bin/www_bget?ko:K13680
Cluster-29035.33034	0.05	0	0	0.05	1474	K13680	CSLA	beta-mannan synthase	http://www.genome.jp/dbget-bin/www_bget?ko:K13680
Cluster-29035.5113	0	0.68	0.29	0	1022	K13680	CSLA	beta-mannan synthase	http://www.genome.jp/dbget-bin/www_bget?ko:K13680
Cluster-29035.103137	2.09	2.86	2.11	3.14	2102	K13680	CSLA	beta-mannan synthase	http://www.genome.jp/dbget-bin/www_bget?ko:K13680
Cluster-29035.121672	0	0	0	0	2611	K13680	CSLA	beta-mannan synthase	http://www.genome.jp/dbget-bin/www_bget?ko:K13680
Cluster-29035.131667	0.78	0	0.32	0	2430	K13680	CSLA	beta-mannan synthase	http://www.genome.jp/dbget-bin/www_bget?ko:K13680
Cluster-29035.121673	0.32	1.72	0.34	0	2404	K13680	CSLA	beta-mannan synthase	http://www.genome.jp/dbget-bin/www_bget?ko:K13680
Cluster-29035.63783	3.24	8.41	2.75	3.58	2256	K13680	CSLA	beta-mannan synthase	http://www.genome.jp/dbget-bin/www_bget?ko:K13680
Cluster-29035.75668	5.68	0	2.45	0	2282	K13680	CSLA	beta-mannan synthase	http://www.genome.jp/dbget-bin/www_bget?ko:K13680
Cluster-29035.63784	0.36	0.97	0.44	0.41	2183	K13680	CSLA	beta-mannan synthase	http://www.genome.jp/dbget-bin/www_bget?ko:K13680
Cluster-29035.47822	0.12	0	0	0	2463	K13680	CSLA	beta-mannan synthase	http://www.genome.jp/dbget-bin/www_bget?ko:K13680
Cluster-29035.47823	0.4	0.48	0.29	0.39	1614	K13680	CSLA	beta-mannan synthase	http://www.genome.jp/dbget-bin/www_bget?ko:K13680
Cluster-29035.192493	0	0	0	0	2538	K13680	CSLA	beta-mannan synthase	http://www.genome.jp/dbget-bin/www_bget?ko:K13680
Cluster-29035.192495	0.02	0	0.51	0	2582	K13680	CSLA	beta-mannan synthase	http://www.genome.jp/dbget-bin/www_bget?ko:K13680
Cluster-29035.33149	0	1.92	0	0.8	296	K13680	CSLA	beta-mannan synthase	http://www.genome.jp/dbget-bin/www_bget?ko:K13680
Cluster-29035.31737	0.66	0.33	4.48	5.29	393	K13680	CSLA	beta-mannan synthase	http://www.genome.jp/dbget-bin/www_bget?ko:K13680
Cluster-29035.192505	0	0	0.69	0.15	1126	K13680	CSLA	beta-mannan synthase	http://www.genome.jp/dbget-bin/www_bget?ko:K13680
glucose-1-phosphate adenylyltransferase
Cluster-29035.141954	6.12	0	0	0	254	K00975	glgC	glucose-1-phosphate adenylyltransferase	http://www.genome.jp/dbget-bin/www_bget?ko:K00975
Cluster-29035.104142	0.64	7.04	0.53	1.32	966	K00975	glgC	glucose-1-phosphate adenylyltransferase	http://www.genome.jp/dbget-bin/www_bget?ko:K00975
Cluster-29035.104141	78.24	168.85	45.49	45.06	2110	K00975	glgC	glucose-1-phosphate adenylyltransferase	http://www.genome.jp/dbget-bin/www_bget?ko:K00975
Cluster-29035.101100	2.01	0.86	1.34	0.83	1954	K00975	glgC	glucose-1-phosphate adenylyltransferase	http://www.genome.jp/dbget-bin/www_bget?ko:K00975
Cluster-29035.92095	0.16	0.1	0.25	0.02	2156	K00975	glgC	glucose-1-phosphate adenylyltransferase	http://www.genome.jp/dbget-bin/www_bget?ko:K00975
Cluster-29035.90889	0	0	0	0	1974	K00975	glgC	glucose-1-phosphate adenylyltransferase	http://www.genome.jp/dbget-bin/www_bget?ko:K00975
Cluster-29035.102697	0.01	0	0.16	0.25	2049	K00975	glgC	glucose-1-phosphate adenylyltransferase	http://www.genome.jp/dbget-bin/www_bget?ko:K00975
Cluster-29035.65822	0.1	0.95	2.13	3.45	1008	K00975	glgC	glucose-1-phosphate adenylyltransferase	http://www.genome.jp/dbget-bin/www_bget?ko:K00975
Cluster-29035.92097	0.01	5.01	1.21	8.32	1364	K00975	glgC	glucose-1-phosphate adenylyltransferase	http://www.genome.jp/dbget-bin/www_bget?ko:K00975
Cluster-29035.92092	9.27	5.24	7.6	0.53	1546	K00975	glgC	glucose-1-phosphate adenylyltransferase	http://www.genome.jp/dbget-bin/www_bget?ko:K00975
Cluster-29035.92091	0	0	0	0.04	1439	K00975	glgC	glucose-1-phosphate adenylyltransferase	http://www.genome.jp/dbget-bin/www_bget?ko:K00975
Cluster-29035.112954	2.25	33.16	6.03	12.39	2287	K00975	glgC	glucose-1-phosphate adenylyltransferase	http://www.genome.jp/dbget-bin/www_bget?ko:K00975
Cluster-29035.118332	264.96	293.52	164.27	119.24	1992	K00975	glgC	glucose-1-phosphate adenylyltransferase	http://www.genome.jp/dbget-bin/www_bget?ko:K00975
Cluster-29035.109996	100.77	0.56	40.31	0.21	2038	K00975	glgC	glucose-1-phosphate adenylyltransferase	http://www.genome.jp/dbget-bin/www_bget?ko:K00975
Cluster-29035.129201	0	3.37	0.22	0.23	1895	K00975	glgC	glucose-1-phosphate adenylyltransferase	http://www.genome.jp/dbget-bin/www_bget?ko:K00975
Cluster-29035.127131	53.48	36.26	95.35	71.87	1879	K00975	glgC	glucose-1-phosphate adenylyltransferase	http://www.genome.jp/dbget-bin/www_bget?ko:K00975
Cluster-29035.102698	11.31	6.93	19.56	26.16	2061	K00975	glgC	glucose-1-phosphate adenylyltransferase	http://www.genome.jp/dbget-bin/www_bget?ko:K00975
mannose-1-phosphate guanylyltransferase
Cluster-29035.128561	1.93	0.2	2.37	0	962	K00966	GMPP	mannose-1-phosphate guanylyltransferase	http://www.genome.jp/dbget-bin/www_bget?ko:K00966
Cluster-29035.72967	69.34	68.23	51.85	63.68	366	K00966	GMPP	mannose-1-phosphate guanylyltransferase	http://www.genome.jp/dbget-bin/www_bget?ko:K00966
Cluster-29035.121212	90.8	81.52	81.12	69.09	341	K00966	GMPP	mannose-1-phosphate guanylyltransferase	http://www.genome.jp/dbget-bin/www_bget?ko:K00966
Cluster-29035.146238	0	0	0	0	214	K00966	GMPP	mannose-1-phosphate guanylyltransferase	http://www.genome.jp/dbget-bin/www_bget?ko:K00966
Cluster-29035.108485	1.91	5.8	3.36	6.42	1509	K00966	GMPP	mannose-1-phosphate guanylyltransferase	http://www.genome.jp/dbget-bin/www_bget?ko:K00966
Cluster-29035.94132	37.77	26.34	32.65	24.41	2107	K00966	GMPP	mannose-1-phosphate guanylyltransferase	http://www.genome.jp/dbget-bin/www_bget?ko:K00966
Cluster-29035.108496	69.71	198.43	271.08	417.83	1431	K00966	GMPP	mannose-1-phosphate guanylyltransferase	http://www.genome.jp/dbget-bin/www_bget?ko:K00966
Cluster-29035.124534	18.55	3.64	6.74	12.98	602	K00966	GMPP	mannose-1-phosphate guanylyltransferase	http://www.genome.jp/dbget-bin/www_bget?ko:K00966
Cluster-29035.137775	3.86	1.14	1.41	1.91	1735	K00966	GMPP	mannose-1-phosphate guanylyltransferase	http://www.genome.jp/dbget-bin/www_bget?ko:K00966
Cluster-29035.122401	0	0	0.31	0	576	K00966	GMPP	mannose-1-phosphate guanylyltransferase	http://www.genome.jp/dbget-bin/www_bget?ko:K00966
Cluster-29035.137889	55.22	49.89	54.43	44.37	589	K00966	GMPP	mannose-1-phosphate guanylyltransferase	http://www.genome.jp/dbget-bin/www_bget?ko:K00966
Cluster-29035.109741	0.81	7.29	2.88	7.4	2226	K00966	GMPP	mannose-1-phosphate guanylyltransferase	http://www.genome.jp/dbget-bin/www_bget?ko:K00966
Cluster-29035.122404	5.27	0.18	2.19	0.2	1196	K00966	GMPP	mannose-1-phosphate guanylyltransferase	http://www.genome.jp/dbget-bin/www_bget?ko:K00966
Cluster-29035.70198	0.72	0	0	0	1430	K00966	GMPP	mannose-1-phosphate guanylyltransferase	http://www.genome.jp/dbget-bin/www_bget?ko:K00966
Cluster-29035.171925	0	0.54	0.92	0.56	1373	K00966	GMPP	mannose-1-phosphate guanylyltransferase	http://www.genome.jp/dbget-bin/www_bget?ko:K00966
Cluster-29035.211201	0	0	0.11	0.31	656	K00966	GMPP	mannose-1-phosphate guanylyltransferase	http://www.genome.jp/dbget-bin/www_bget?ko:K00966
Cluster-29035.72141	0	0.49	0.4	0.29	539	K00966	GMPP	mannose-1-phosphate guanylyltransferase	http://www.genome.jp/dbget-bin/www_bget?ko:K00966
Cluster-29035.122402	11.51	22.46	15.08	21.59	1661	K00966	GMPP	mannose-1-phosphate guanylyltransferase	http://www.genome.jp/dbget-bin/www_bget?ko:K00966
Cluster-29035.122403	14.22	1.02	7.68	0.38	1660	K00966	GMPP	mannose-1-phosphate guanylyltransferase	http://www.genome.jp/dbget-bin/www_bget?ko:K00966
2,3-bisphosphoglycerate-independent phosphoglycerate mutase
Cluster-29035.113664	2.77	84.57	16.46	37.16	824	K15633	gpmI	2,3-bisphosphoglycerate-independent phosphoglycerate mutase	http://www.genome.jp/dbget-bin/www_bget?ko:K15633
Cluster-29035.132731	49.28	0.15	15.61	0.13	562	K15633	gpmI	2,3-bisphosphoglycerate-independent phosphoglycerate mutase	http://www.genome.jp/dbget-bin/www_bget?ko:K15633
Cluster-29035.110501	8.26	33.72	12.05	12.86	1560	K15633	gpmI	2,3-bisphosphoglycerate-independent phosphoglycerate mutase	http://www.genome.jp/dbget-bin/www_bget?ko:K15633
Cluster-29035.112861	622.94	0.37	202.19	0	608	K15633	gpmI	2,3-bisphosphoglycerate-independent phosphoglycerate mutase	http://www.genome.jp/dbget-bin/www_bget?ko:K15633
Cluster-29035.112532	526.41	412.65	279.88	194.11	1357	K15633	gpmI	2,3-bisphosphoglycerate-independent phosphoglycerate mutase	http://www.genome.jp/dbget-bin/www_bget?ko:K15633
Cluster-29035.113794	596.72	528.44	389.48	317.55	903	K15633	gpmI	2,3-bisphosphoglycerate-independent phosphoglycerate mutase	http://www.genome.jp/dbget-bin/www_bget?ko:K15633
Cluster-29035.128769	5.25	3.93	0.67	0.87	471	K15633	gpmI	2,3-bisphosphoglycerate-independent phosphoglycerate mutase	http://www.genome.jp/dbget-bin/www_bget?ko:K15633
Cluster-29035.78269	30.96	1.54	20.03	3.21	413	K15633	gpmI	2,3-bisphosphoglycerate-independent phosphoglycerate mutase	http://www.genome.jp/dbget-bin/www_bget?ko:K15633
Cluster-29035.128770	0.68	2.47	0.71	1.46	424	K15633	gpmI	2,3-bisphosphoglycerate-independent phosphoglycerate mutase	http://www.genome.jp/dbget-bin/www_bget?ko:K15633
Cluster-29035.112531	0.82	1.03	0.17	0.21	1115	K15633	gpmI	2,3-bisphosphoglycerate-independent phosphoglycerate mutase	http://www.genome.jp/dbget-bin/www_bget?ko:K15633
Cluster-29035.115117	11.69	36.4	12.48	24.34	991	K15633	gpmI	2,3-bisphosphoglycerate-independent phosphoglycerate mutase	http://www.genome.jp/dbget-bin/www_bget?ko:K15633
mannose-6-phosphate isomerase
Cluster-29035.62229	14.01	20.44	34.66	39.08	640	K01809	manA, MPI	mannose-6-phosphate isomerase	http://www.genome.jp/dbget-bin/www_bget?ko:K01809
Cluster-29035.128750	9.89	1.9	7.72	9.92	568	K01809	manA, MPI	mannose-6-phosphate isomerase	http://www.genome.jp/dbget-bin/www_bget?ko:K01809
Cluster-29035.103751	5.09	25.12	36.44	47.3	2270	K01809	manA, MPI	mannose-6-phosphate isomerase	http://www.genome.jp/dbget-bin/www_bget?ko:K01809
Cluster-29035.115664	11.52	10.37	10.15	20.28	2200	K01809	manA, MPI	mannose-6-phosphate isomerase	http://www.genome.jp/dbget-bin/www_bget?ko:K01809
alpha-mannosidase II
Cluster-29035.139986	6.28	5.42	7.04	4.6	1250	K01231	MAN2	alpha-mannosidase II	http://www.genome.jp/dbget-bin/www_bget?ko:K01231
Cluster-29035.90942	0.42	0.28	0.97	0.69	1920	K01231	MAN2	alpha-mannosidase II	http://www.genome.jp/dbget-bin/www_bget?ko:K01231
Cluster-29035.139985	3.33	10.74	10.17	11.14	3081	K01231	MAN2	alpha-mannosidase II	http://www.genome.jp/dbget-bin/www_bget?ko:K01231
Cluster-29035.61808	0.55	0.74	0.58	0.17	2956	K01231	MAN2	alpha-mannosidase II	http://www.genome.jp/dbget-bin/www_bget?ko:K01231
Cluster-29035.90943	8.54	0.45	4.74	0.85	3247	K01231	MAN2	alpha-mannosidase II	http://www.genome.jp/dbget-bin/www_bget?ko:K01231
mannosyl-oligosaccharide alpha-1,2-mannosidase
Cluster-29035.115136	23.15	27.04	23.96	21.99	1835	K01230	MAN1	mannosyl-oligosaccharide alpha-1,2-mannosidase	http://www.genome.jp/dbget-bin/www_bget?ko:K01230
Cluster-29035.82000	0.22	0.66	0.24	0.49	931	K01230	MAN1	mannosyl-oligosaccharide alpha-1,2-mannosidase	http://www.genome.jp/dbget-bin/www_bget?ko:K01230
Cluster-29035.66597	21.42	0	10.37	0	605	K01230	MAN1	mannosyl-oligosaccharide alpha-1,2-mannosidase	http://www.genome.jp/dbget-bin/www_bget?ko:K01230
Cluster-29035.87388	11.37	0	5.41	0	742	K01230	MAN1	mannosyl-oligosaccharide alpha-1,2-mannosidase	http://www.genome.jp/dbget-bin/www_bget?ko:K01230
Cluster-29035.138646	4.8	1.89	3.03	2.01	2026	K01230	MAN1	mannosyl-oligosaccharide alpha-1,2-mannosidase	http://www.genome.jp/dbget-bin/www_bget?ko:K01230
Cluster-29035.110094	46.85	34.56	37.08	29.58	1755	K01230	MAN1	mannosyl-oligosaccharide alpha-1,2-mannosidase	http://www.genome.jp/dbget-bin/www_bget?ko:K01230
Cluster-29035.110093	0.15	6.74	2.59	6.8	572	K01230	MAN1	mannosyl-oligosaccharide alpha-1,2-mannosidase	http://www.genome.jp/dbget-bin/www_bget?ko:K01230
Cluster-29035.110092	15.72	20.95	14.62	16.45	603	K01230	MAN1	mannosyl-oligosaccharide alpha-1,2-mannosidase	http://www.genome.jp/dbget-bin/www_bget?ko:K01230
mannan endo-1,4-beta-mannosidase
Cluster-29035.55720	0	0	0	0.4	986	K19355	MAN	mannan endo-1,4-beta-mannosidase	http://www.genome.jp/dbget-bin/www_bget?ko:K19355
Cluster-29035.55723	0.26	0.19	0.06	0	973	K19355	MAN	mannan endo-1,4-beta-mannosidase	http://www.genome.jp/dbget-bin/www_bget?ko:K19355
Cluster-29035.171047	0.24	1.89	2.43	2.68	1811	K19355	MAN	mannan endo-1,4-beta-mannosidase	http://www.genome.jp/dbget-bin/www_bget?ko:K19355
Cluster-29035.55727	0.4	0.53	0.95	1.37	1745	K19355	MAN	mannan endo-1,4-beta-mannosidase	http://www.genome.jp/dbget-bin/www_bget?ko:K19355
Cluster-29035.55725	0.96	0.87	1.06	1.52	1180	K19355	MAN	mannan endo-1,4-beta-mannosidase	http://www.genome.jp/dbget-bin/www_bget?ko:K19355
Cluster-29035.55721	1.96	4.48	3.34	6.03	815	K19355	MAN	mannan endo-1,4-beta-mannosidase	http://www.genome.jp/dbget-bin/www_bget?ko:K19355
Cluster-29035.86319	0.85	0	0.98	0	795	K19355	MAN	mannan endo-1,4-beta-mannosidase	http://www.genome.jp/dbget-bin/www_bget?ko:K19355
Cluster-29035.55722	0.87	1.45	0.43	0.93	1678	K19355	MAN	mannan endo-1,4-beta-mannosidase	http://www.genome.jp/dbget-bin/www_bget?ko:K19355
Cluster-29035.55726	0.2	0	0.1	0	1179	K19355	MAN	mannan endo-1,4-beta-mannosidase	http://www.genome.jp/dbget-bin/www_bget?ko:K19355
Cluster-29035.23392	0	0.47	0	0.32	1019	K19355	MAN	mannan endo-1,4-beta-mannosidase	http://www.genome.jp/dbget-bin/www_bget?ko:K19355
Cluster-29035.195885	0	0.27	0.25	0.06	1011	K19355	MAN	mannan endo-1,4-beta-mannosidase	http://www.genome.jp/dbget-bin/www_bget?ko:K19355
Cluster-17799.0	0.1	0	0.45	1.05	729	K19355	MAN	mannan endo-1,4-beta-mannosidase	http://www.genome.jp/dbget-bin/www_bget?ko:K19355
Cluster-5140.0	0	0	0.36	0.53	488	K19355	MAN	mannan endo-1,4-beta-mannosidase	http://www.genome.jp/dbget-bin/www_bget?ko:K19355
Cluster-10256.0	7.75	0	2.46	0	266	K19355	MAN	mannan endo-1,4-beta-mannosidase	http://www.genome.jp/dbget-bin/www_bget?ko:K19355
Cluster-2418.0	0	7.24	8.14	16.55	239	K19355	MAN	mannan endo-1,4-beta-mannosidase	http://www.genome.jp/dbget-bin/www_bget?ko:K19355
Cluster-29035.166745	0.38	0	0	0.23	391	K19355	MAN	mannan endo-1,4-beta-mannosidase	http://www.genome.jp/dbget-bin/www_bget?ko:K19355
Cluster-29035.145338	1.31	0.3	0.89	0.46	1101	K19355	MAN	mannan endo-1,4-beta-mannosidase	http://www.genome.jp/dbget-bin/www_bget?ko:K19355
Cluster-29035.51566	6.34	7.69	5.21	6.41	1466	K19355	MAN	mannan endo-1,4-beta-mannosidase	http://www.genome.jp/dbget-bin/www_bget?ko:K19355
Cluster-29035.55724	0.23	0	0.16	0.28	1871	K19355	MAN	mannan endo-1,4-beta-mannosidase	http://www.genome.jp/dbget-bin/www_bget?ko:K19355
Cluster-29035.194524	0.14	0	5.1	44.94	1238	K19355	MAN	mannan endo-1,4-beta-mannosidase	http://www.genome.jp/dbget-bin/www_bget?ko:K19355
Cluster-29035.194335	0.1	0.53	2.44	5.3	1223	K19355	MAN	mannan endo-1,4-beta-mannosidase	http://www.genome.jp/dbget-bin/www_bget?ko:K19355
Cluster-29035.35130	0	0.3	0	0	1325	K19355	MAN	mannan endo-1,4-beta-mannosidase	http://www.genome.jp/dbget-bin/www_bget?ko:K19355
Cluster-29035.10593	0	0	0.69	0.28	1317	K19355	MAN	mannan endo-1,4-beta-mannosidase	http://www.genome.jp/dbget-bin/www_bget?ko:K19355
Cluster-29035.35131	0.2	0	0	0	1313	K19355	MAN	mannan endo-1,4-beta-mannosidase	http://www.genome.jp/dbget-bin/www_bget?ko:K19355
Cluster-29035.184178	0.97	0	0.44	0	1032	K19355	MAN	mannan endo-1,4-beta-mannosidase	http://www.genome.jp/dbget-bin/www_bget?ko:K19355
Cluster-29035.120062	178.2	102.94	102.14	54.12	774	K19355	MAN	mannan endo-1,4-beta-mannosidase	http://www.genome.jp/dbget-bin/www_bget?ko:K19355
Cluster-29035.208154	0.22	0	6.12	63.82	673	K19355	MAN	mannan endo-1,4-beta-mannosidase	http://www.genome.jp/dbget-bin/www_bget?ko:K19355
Cluster-1622.0	0	0	0.46	1.38	340	K19355	MAN	mannan endo-1,4-beta-mannosidase	http://www.genome.jp/dbget-bin/www_bget?ko:K19355
Cluster-29035.166751	3.26	0.11	0.84	0	1945	K19355	MAN	mannan endo-1,4-beta-mannosidase	http://www.genome.jp/dbget-bin/www_bget?ko:K19355
Cluster-29035.166747	0.55	0	0.31	0	1195	K19355	MAN	mannan endo-1,4-beta-mannosidase	http://www.genome.jp/dbget-bin/www_bget?ko:K19355
Cluster-29035.4468	0	0	3.71	18.83	1346	K19355	MAN	mannan endo-1,4-beta-mannosidase	http://www.genome.jp/dbget-bin/www_bget?ko:K19355
Cluster-29035.221619	0	0.21	0.86	5.86	910	K19355	MAN	mannan endo-1,4-beta-mannosidase	http://www.genome.jp/dbget-bin/www_bget?ko:K19355
Cluster-29035.198341	0	0	0.14	1.88	1006	K19355	MAN	mannan endo-1,4-beta-mannosidase	http://www.genome.jp/dbget-bin/www_bget?ko:K19355
Cluster-1413.0	0	0	0.29	0.28	990	K19355	MAN	mannan endo-1,4-beta-mannosidase	http://www.genome.jp/dbget-bin/www_bget?ko:K19355
Cluster-29035.166750	12.56	0	3.26	0.11	1413	K19355	MAN	mannan endo-1,4-beta-mannosidase	http://www.genome.jp/dbget-bin/www_bget?ko:K19355
Cluster-21195.0	10.04	0	5.2	0	699	K19355	MAN	mannan endo-1,4-beta-mannosidase	http://www.genome.jp/dbget-bin/www_bget?ko:K19355
Cluster-29035.29034	0	0	4.56	6.54	457	K19355	MAN	mannan endo-1,4-beta-mannosidase	http://www.genome.jp/dbget-bin/www_bget?ko:K19355
Cluster-29035.188849	0.85	1.06	1.06	0.7	1468	K19355	MAN	mannan endo-1,4-beta-mannosidase	http://www.genome.jp/dbget-bin/www_bget?ko:K19355
Cluster-29035.27833	0.48	0.16	0.29	0.55	544	K19355	MAN	mannan endo-1,4-beta-mannosidase	http://www.genome.jp/dbget-bin/www_bget?ko:K19355
Cluster-29035.166748	0	0	0.97	0	2662	K19355	MAN	mannan endo-1,4-beta-mannosidase	http://www.genome.jp/dbget-bin/www_bget?ko:K19355
Cluster-29035.166746	1.73	0.29	0	0.47	2674	K19355	MAN	mannan endo-1,4-beta-mannosidase	http://www.genome.jp/dbget-bin/www_bget?ko:K19355
Cluster-29035.194523	0	0	0.24	1.09	750	K19355	MAN	mannan endo-1,4-beta-mannosidase	http://www.genome.jp/dbget-bin/www_bget?ko:K19355
Cluster-29035.19360	0	0	0.43	5.23	741	K19355	MAN	mannan endo-1,4-beta-mannosidase	http://www.genome.jp/dbget-bin/www_bget?ko:K19355
Cluster-29035.120067	2.75	0.06	1.6	0	1810	K19355	MAN	mannan endo-1,4-beta-mannosidase	http://www.genome.jp/dbget-bin/www_bget?ko:K19355
Cluster-29035.120065	2.82	3.1	1.31	1.79	1396	K19355	MAN	mannan endo-1,4-beta-mannosidase	http://www.genome.jp/dbget-bin/www_bget?ko:K19355
Cluster-29035.35056	0	0	1.9	12.39	740	K19355	MAN	mannan endo-1,4-beta-mannosidase	http://www.genome.jp/dbget-bin/www_bget?ko:K19355
Cluster-29035.3758	0	0	1.22	5.49	607	K19355	MAN	mannan endo-1,4-beta-mannosidase	http://www.genome.jp/dbget-bin/www_bget?ko:K19355
Cluster-29035.161414	6.08	7.35	2.4	3.38	374	K19355	MAN	mannan endo-1,4-beta-mannosidase	http://www.genome.jp/dbget-bin/www_bget?ko:K19355
Cluster-29035.51563	1.15	2.95	1.62	3.48	1756	K19355	MAN	mannan endo-1,4-beta-mannosidase	http://www.genome.jp/dbget-bin/www_bget?ko:K19355
Cluster-29035.51567	0	0.7	0.6	1.79	317	K19355	MAN	mannan endo-1,4-beta-mannosidase	http://www.genome.jp/dbget-bin/www_bget?ko:K19355
Cluster-29035.204265	0.08	4.63	1.49	5.12	861	K19355	MAN	mannan endo-1,4-beta-mannosidase	http://www.genome.jp/dbget-bin/www_bget?ko:K19355
Cluster-29035.188850	10.46	14.3	13.08	15.27	1759	K19355	MAN	mannan endo-1,4-beta-mannosidase	http://www.genome.jp/dbget-bin/www_bget?ko:K19355
Cluster-29035.4667	0	0	0.29	1.75	1148	K19355	MAN	mannan endo-1,4-beta-mannosidase	http://www.genome.jp/dbget-bin/www_bget?ko:K19355
Cluster-29035.120063	125.6	69.41	74.1	35.36	550	K19355	MAN	mannan endo-1,4-beta-mannosidase	http://www.genome.jp/dbget-bin/www_bget?ko:K19355
Cluster-29035.45199	0.9	2.42	0.7	3.2	620	K19355	MAN	mannan endo-1,4-beta-mannosidase	http://www.genome.jp/dbget-bin/www_bget?ko:K19355
Cluster-29035.23000	0	0	0.33	1.67	719	K19355	MAN	mannan endo-1,4-beta-mannosidase	http://www.genome.jp/dbget-bin/www_bget?ko:K19355
Cluster-29035.184177	0.11	0.73	1.83	1.01	1932	K19355	MAN	mannan endo-1,4-beta-mannosidase	http://www.genome.jp/dbget-bin/www_bget?ko:K19355
Cluster-29035.104008	0	0.2	0	0	1636	K19355	MAN	mannan endo-1,4-beta-mannosidase	http://www.genome.jp/dbget-bin/www_bget?ko:K19355
Cluster-29035.60418	0	0	0	0	1348	K19355	MAN	mannan endo-1,4-beta-mannosidase	http://www.genome.jp/dbget-bin/www_bget?ko:K19355
Cluster-29035.120066	0.66	11.37	2.69	6.81	1014	K19355	MAN	mannan endo-1,4-beta-mannosidase	http://www.genome.jp/dbget-bin/www_bget?ko:K19355
phosphoglucomutase
Cluster-29035.118901	1.06	0.34	0.55	0.29	1933	K01835	pgm	phosphoglucomutase	http://www.genome.jp/dbget-bin/www_bget?ko:K01835
Cluster-29035.86015	36.2	0	22.22	0	845	K01835	pgm	phosphoglucomutase	http://www.genome.jp/dbget-bin/www_bget?ko:K01835
Cluster-29035.66046	0	0.48	0.38	0.14	1212	K01835	pgm	phosphoglucomutase	http://www.genome.jp/dbget-bin/www_bget?ko:K01835
Cluster-29035.144547	1.21	0.5	0.34	0.21	1121	K01835	pgm	phosphoglucomutase	http://www.genome.jp/dbget-bin/www_bget?ko:K01835
Cluster-29035.123973	127.98	196.88	115.6	128.94	2641	K01835	pgm	phosphoglucomutase	http://www.genome.jp/dbget-bin/www_bget?ko:K01835
Cluster-29035.117225	42.52	0	26.3	0	2610	K01835	pgm	phosphoglucomutase	http://www.genome.jp/dbget-bin/www_bget?ko:K01835
Cluster-29035.132554	0.75	0.97	1.38	1.45	1731	K01835	pgm	phosphoglucomutase	http://www.genome.jp/dbget-bin/www_bget?ko:K01835
Cluster-29035.99595	34.5	4.58	18.94	6.3	2046	K01835	pgm	phosphoglucomutase	http://www.genome.jp/dbget-bin/www_bget?ko:K01835
Cluster-29035.131690	0.32	0	0.25	0	1772	K01835	pgm	phosphoglucomutase	http://www.genome.jp/dbget-bin/www_bget?ko:K01835
Cluster-29035.97489	31.24	38.73	61.97	62.54	2071	K01835	pgm	phosphoglucomutase	http://www.genome.jp/dbget-bin/www_bget?ko:K01835
Cluster-29035.132552	6.02	0.48	2.45	0.62	644	K01835	pgm	phosphoglucomutase	http://www.genome.jp/dbget-bin/www_bget?ko:K01835
phosphomannomutase
Cluster-29035.28408	1.07	0.95	3.26	2.22	1227	K17497	PMM	phosphomannomutase	http://www.genome.jp/dbget-bin/www_bget?ko:K17497
Cluster-29035.194252	0	0	0	10.28	1233	K17497	PMM	phosphomannomutase	http://www.genome.jp/dbget-bin/www_bget?ko:K17497
Cluster-29035.194254	17.92	43.47	84.71	97.38	1223	K17497	PMM	phosphomannomutase	http://www.genome.jp/dbget-bin/www_bget?ko:K17497
Cluster-29035.194251	1.13	3.53	3.84	3.53	1159	K17497	PMM	phosphomannomutase	http://www.genome.jp/dbget-bin/www_bget?ko:K17497
