# Supplementary material for: Comparative Transcriptome Analysis and Expression of Genes Associated with Polysaccharide Biosynthesis in Dendrobium officinale Diploid and Tetraploid Plants
Source: MDPI journal article supplement (doi:10.3390/agronomy14010069), 2023-12-27
Supplement: s1 [file s1 › Transcriptome tetraploid D.officinale_Supp Figure S2.pdf]

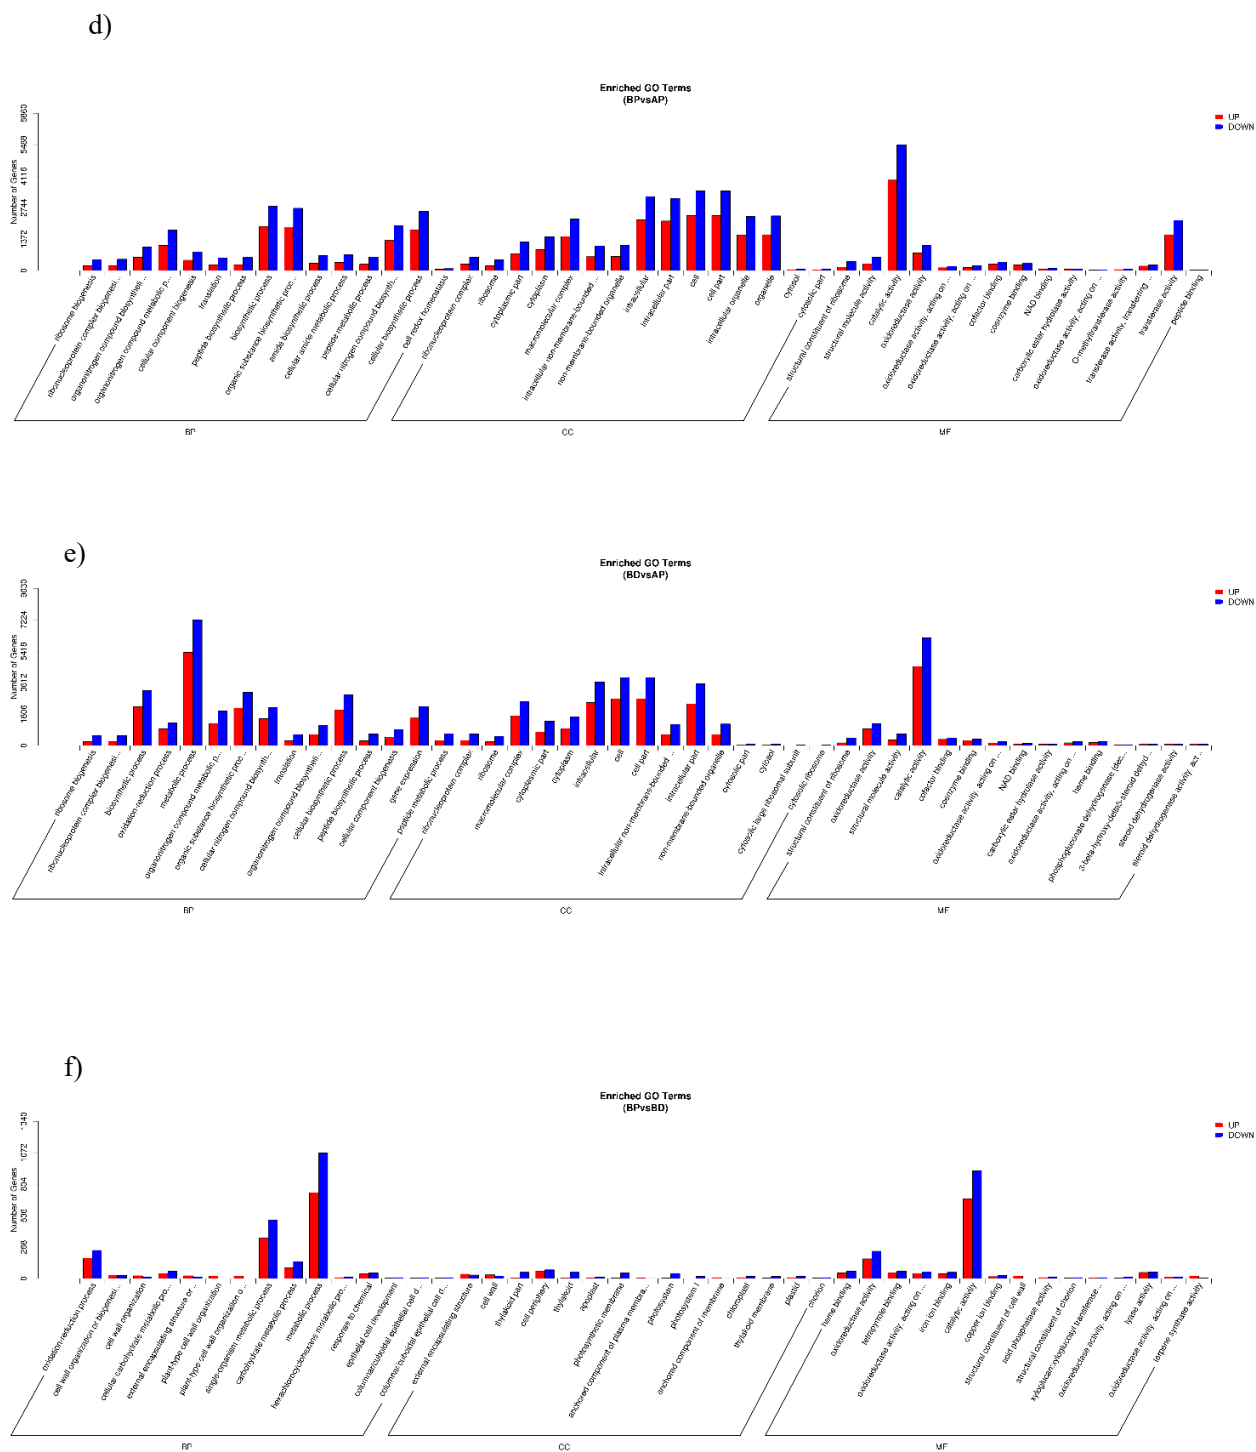

**Supplement Figure S2.** Pairwise comparisons of GO enrichment analysis of DEGs in diploid (A) and tetraploid (B) *D. officinale* at protocorm-like bodies (P) and six-month-old seedling stages (D). The bottom x-axis represents each detailed classification of GO, the upper y-axis indicates the number of DEGs annotated to a GO term: a) AD vs AP; b) AD vs BP; c) AD vs BD; d) AP vs BP; e) AP vs BD; f) BP vs BD.

*AP* - protocorm-like bodies of diploid; *BP* - protocorm-like bodies of tetraploid; *AD* - six-month-old seedlings of diploid; *BD* - six-month-old seedlings of tetraploid

*BP* – biological process; *CC* – cellular component; *MF* – molecular function.
