# Supplementary material for: Comparative Transcriptome Analysis and Expression of Genes Associated with Polysaccharide Biosynthesis in Dendrobium officinale Diploid and Tetraploid Plants
Source: MDPI journal article supplement (doi:10.3390/agronomy14010069), 2023-12-27
Supplement: s1 [file s1 › Transcriptome tetraploid D.officinale_Supp Figures S1, S3 and S4.pdf]

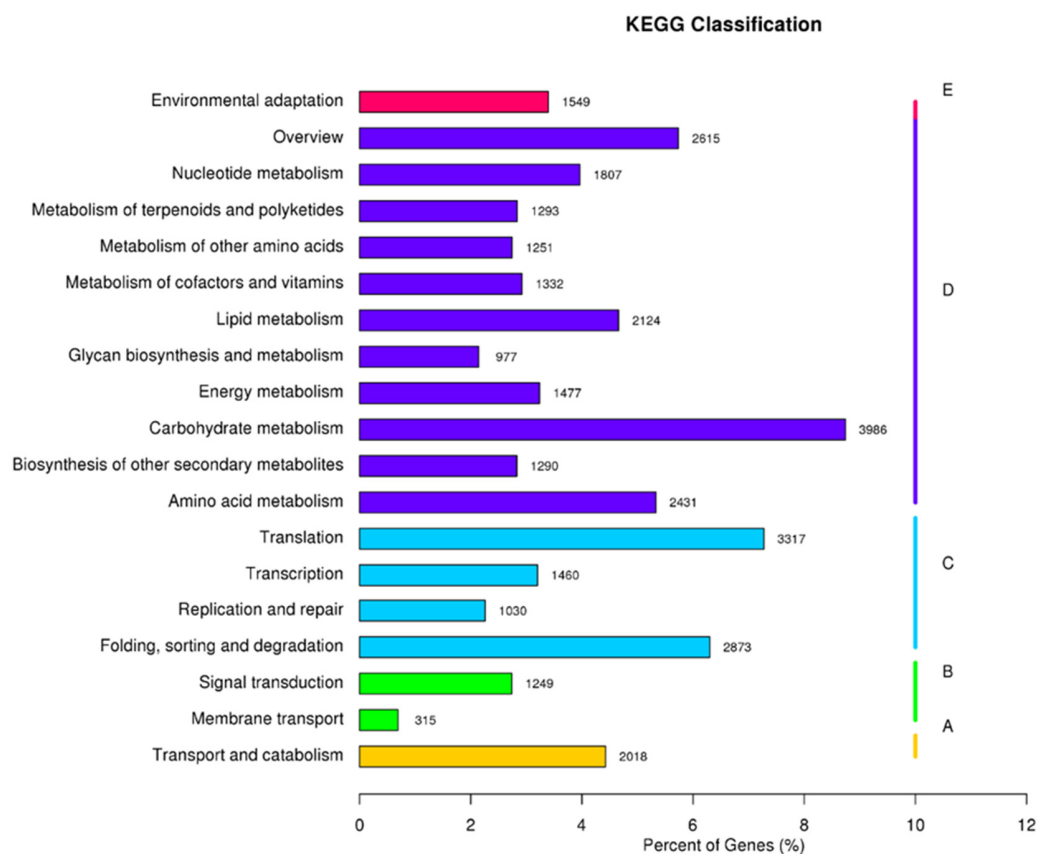

**Supplement Figure. S1** KEGG classifications of *D. officinale* unigenes. A total of 34,394 unigenes were classified into 19 functional categories; the x-axis indicates the percentage of unigenes; the y-axis indicates the name of 19 groups of KEGG; the number of each bar indicates the number of unigenes.

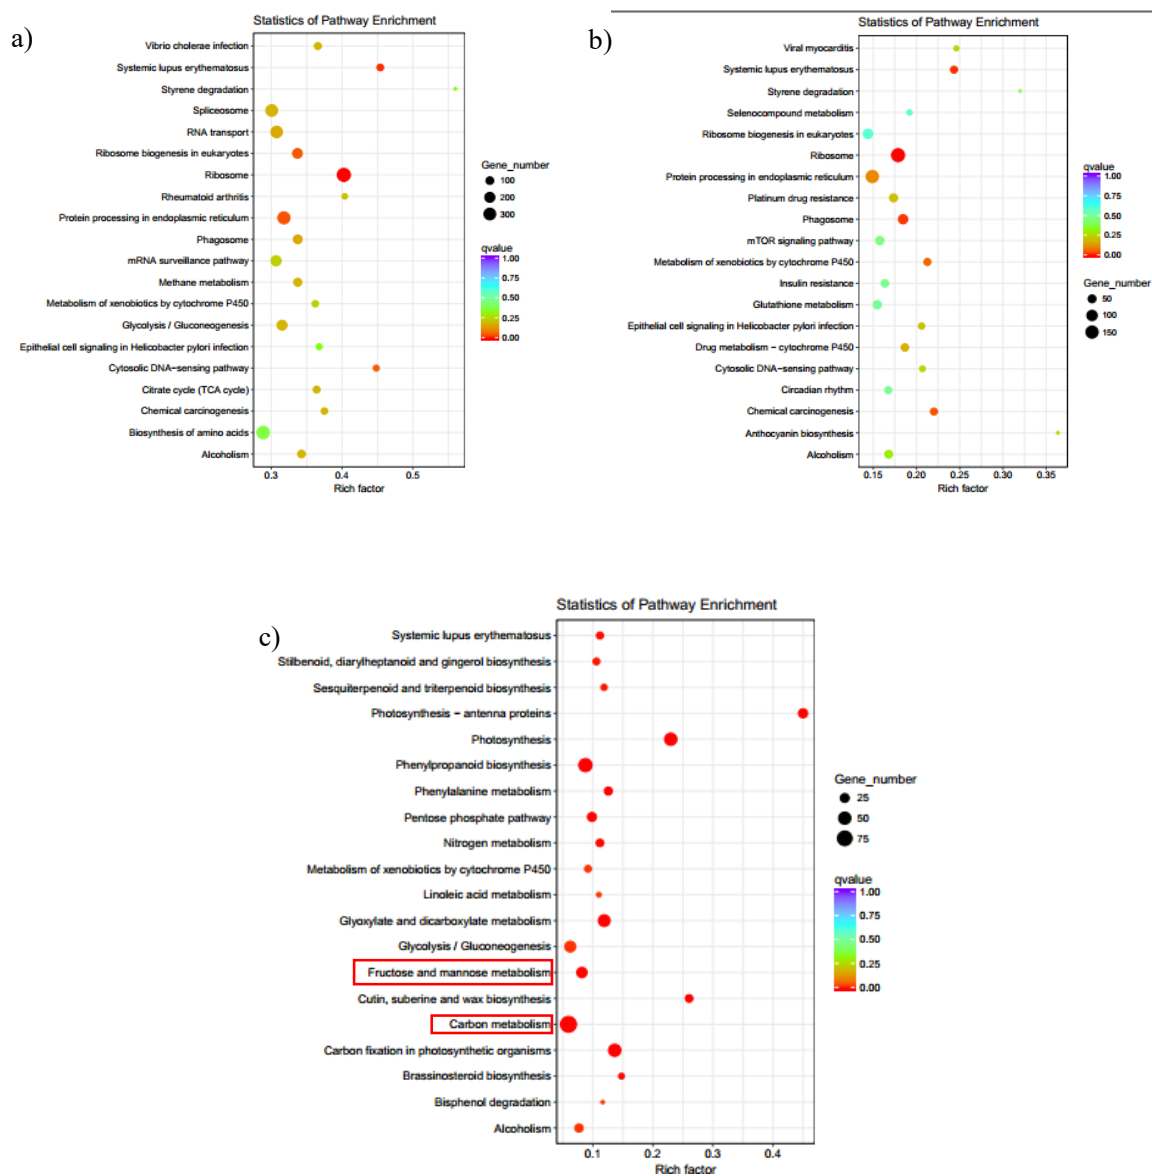

**Supplement Figure. S3** Pairwise KEGG enrichment analysis of DEGs of diploid and tetraploid *D. officinale* for the top 20 pathways at growth stages of protocorm-like bodies and six-month-old seedlings: a) AP vs BP; b) AD vs BD; c) BP vs BD

AP - protocorm-like bodies of diploid; BP - protocorm-like bodies of tetraploid; AD - six-month-old seedlings of diploid; BD - six-month-old seedlings of tetraploid.

a) AP vs BP

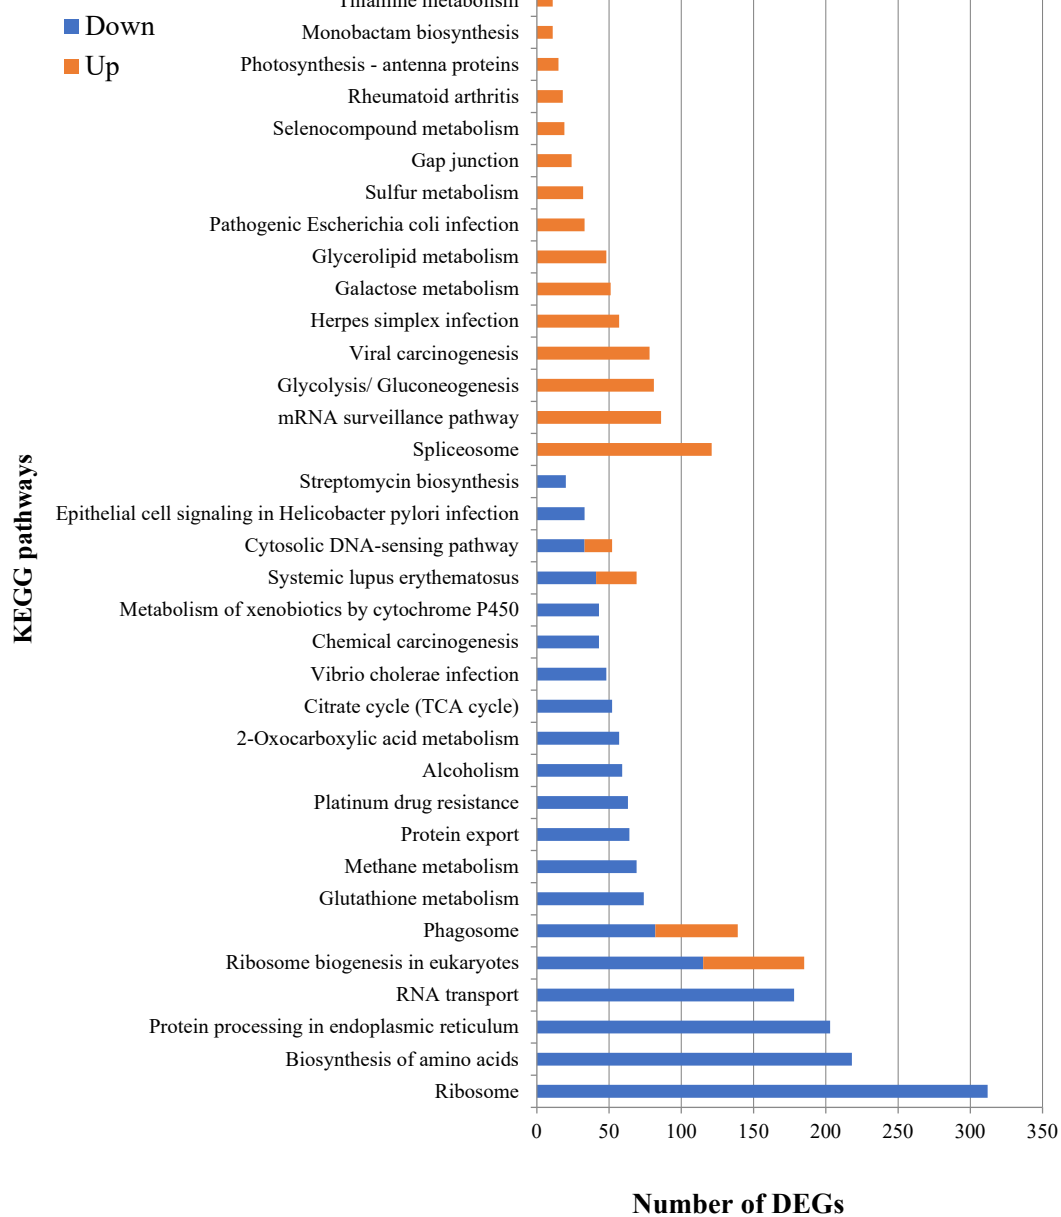

b) AD vs BD

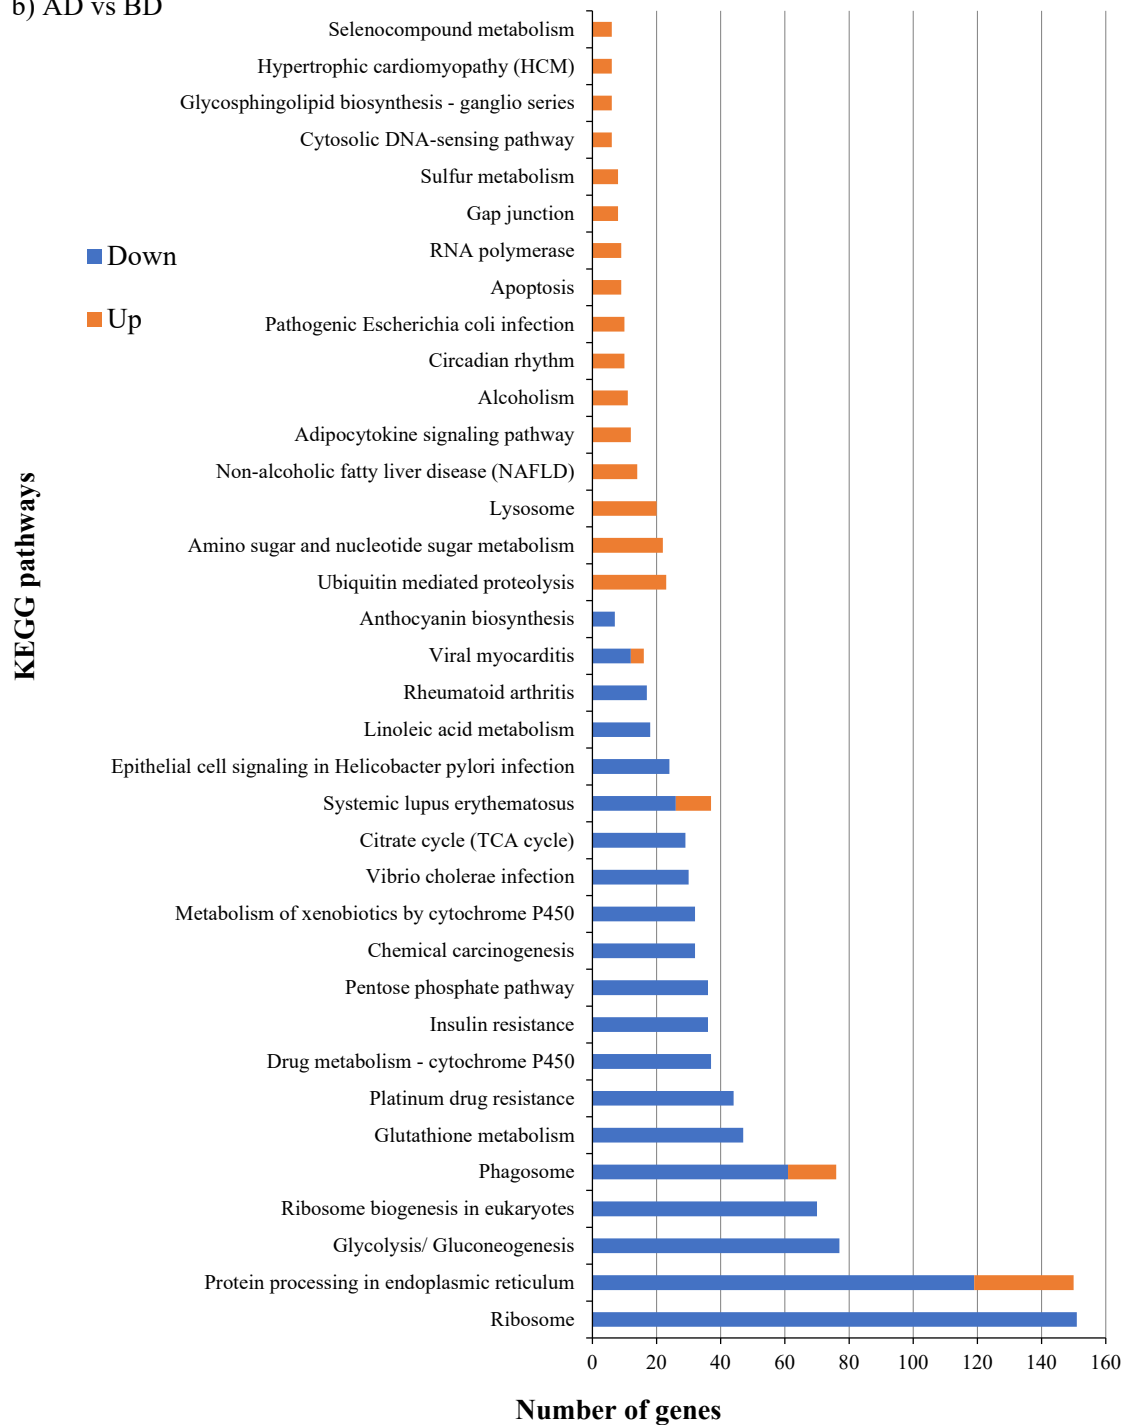

**Supplement Figure S4** Pairwise KEGG enrichment analysis of DEGs in protocorm-like bodies and six-month-old seedlings of diploid and tetraploid *D. officinale* for the top 20 pathways. The bottom x-axis represents indicates the number of genes annotated to a KEGG pathway, the upper y-axis represents each detailed classification of KEGG: a) KEGG enrichment analysis for AP vs BP; b) KEGG enrichment analysis for AD vs BD.

*AP* - protocorm-like bodies of diploid; *BP* - protocorm-like bodies of tetraploid; *AD* – six-month-old seedlings of diploid; *BD* – Six month-old seedlings of tetraploid.
