# Supplementary material for: Comparative Transcriptome Analysis and Expression of Genes Associated with Polysaccharide Biosynthesis in Dendrobium officinale Diploid and Tetraploid Plants
Source: MDPI journal article supplement (doi:10.3390/agronomy14010069), 2023-12-27
Supplement: s1 [file s1 › Transcriptome tetraploid D.officinale_Supp Tables S1 and S3.pdf]

**Supplement Table S1.** Growth stages and growth conditions applied for diploid 201-1 (A) and tetraploid 201-1-T (B) *D. officinale* used for transcriptome analysis

| Samples | Growth stages                         | Growth conditions                                                                                                                                                                                                                                                          |
|---------|---------------------------------------|----------------------------------------------------------------------------------------------------------------------------------------------------------------------------------------------------------------------------------------------------------------------------|
| AP      | PLB of diploid in one month           | ½ MS basal medium, supplemented 6BA 0.5 mg·L <sup>-1</sup> , 20% CW water (v/v) and AC 0.1 g·L <sup>-1</sup> with pH 5.8; 25 ± 2°C under dark                                                                                                                              |
| BP      | PLB of tetraploid in one month        |                                                                                                                                                                                                                                                                            |
| AD      | Seedlings of diploid in six months    | MS basal medium, supplemented 6BA 1.0 mg·L <sup>-1</sup> , NAA 0.5 mg·L <sup>-1</sup> , and AC 0.4 g·L <sup>-1</sup> with pH 5.8 and were incubated at 25 ± 2°C under a 16/8h (light/dark) photoperiod with the light intensity of 35 µmol m <sup>-2</sup> s <sup>-1</sup> |
| BD      | Seedlings of tetraploid in six months |                                                                                                                                                                                                                                                                            |

**Supplement Table S3.** Primers used in qRT-PCR for 11 selected genes, *GAPDH* and *Actin* genes

| Gene                                | Cluster              | Primer sequence (5' - 3') |                          | Number of nucleotides |
|-------------------------------------|----------------------|---------------------------|--------------------------|-----------------------|
| <i>CLSA3-1</i>                      | Cluster-29035.190181 | FW                        | TTCCCTCAAGTAGTGATTCCG    | 22                    |
|                                     |                      | RV                        | CCTTCACTCTCCCTGCCTCTA    | 21                    |
| <i>Doglgc1</i>                      | Cluster-29035.129201 | FW                        | TCTTTGATTGTTGCGTTCTT     | 20                    |
|                                     |                      | RV                        | GGATACTGTGATGATGGGTGCT   | 22                    |
| <i>Doglgc3</i>                      | Cluster-29035.65822  | FW                        | TGCGTCGCTACTGGTCTCTTA    | 22                    |
|                                     |                      | RV                        | GATACTGTGATGATGGGTGCTGA  | 23                    |
| <i>DoGMPP-1</i>                     | Cluster-29035.94132  | FW                        | CGATCCAGGCTTCCTTCACT     | 20                    |
|                                     |                      | RV                        | TCCGACGAACTGAGCAAGAT     | 21                    |
| <i>DoGMPP-2</i>                     | Cluster-29035.108496 | FW                        | GCCGTAGGTTTCGCACTTT      | 18                    |
|                                     |                      | RV                        | CAATGATGCTGCTTGAGACA     | 20                    |
| <i>DoGMPP-3</i>                     | Cluster-29035.122404 | FW                        | TCTCTTCCATTACCACAACACCAT | 24                    |
|                                     |                      | RV                        | ATAAAGTTCCACAAATCACACGCT | 24                    |
| <i>Dogpml</i>                       | Cluster-29035.113664 | FW                        | TGAAACGAGCACCTGGAC       | 18                    |
|                                     |                      | RV                        | AAGGAATAAATCTGGGAAACC    | 21                    |
| <i>DoMan2-2</i>                     | Cluster-29035.194335 | FW                        | AACTCTGCGAACACCACCG      | 19                    |
|                                     |                      | RV                        | GCAACAGCCCACATCTACCC     | 20                    |
| <i>DoPGM1-1</i>                     | Cluster-29035.132552 | FW                        | ACGCTTGTTGTTTCTGGG       | 18                    |
|                                     |                      | RV                        | AGCACCTGTAGCCTTGGA       | 18                    |
| <i>DoPGM1-2</i>                     | Cluster-29035.99595  | FW                        | CGCCAACCTTCTTACCCT       | 18                    |
|                                     |                      | RV                        | TTACAGCAGCGGACAACC       | 18                    |
| <i>DoPMM2-1</i>                     | Cluster-29035.194251 | FW                        | GAGGATGCCAGGGCTTATTGT    | 21                    |
|                                     |                      | RV                        | CCCTCCAACGACACCAACTG     | 20                    |
| <i>GAPDH</i>                        |                      | FW                        | TAAGGCTGCTATAAAGGAAGAATC | 24                    |
|                                     |                      | RV                        | GACCTGCTGTACCCCAAGAA     | 20                    |
| <i>Actin</i><br>(Zhang et al. 2016) |                      | FW                        | TCCCAAGGCAAACAGAGAAA     | 20                    |
|                                     |                      | RV                        | GGCCACTAGCATATAGGGAAAG   | 22                    |
